# Supplementary material for: Multicentre observational study on practice of ventilation in brain injured patients: the VENTIBRAIN study protocol
Source: PubMed Central journal article supplement — BMJ Open. 2021 Aug 11;11(8):e047100. doi: 10.1136/bmjopen-2020-047100 (PMC8359464; doi:10.1136/bmjopen-2020-047100), 2021-08-11
Supplement: bmjopen-2020-047100.draft_revisions.pdf [file bmjopen-2020-047100.draft_revisions.pdf]

# BMJ Open

BMJ Open is committed to open peer review. As part of this commitment we make the peer review history of every article we publish publicly available.

When an article is published we post the peer reviewers' comments and the authors' responses online. We also post the versions of the paper that were used during peer review. These are the versions that the peer review comments apply to.

The versions of the paper that follow are the versions that were submitted during the peer review process. They are not the versions of record or the final published versions. They should not be cited or distributed as the published version of this manuscript.

BMJ Open is an open access journal and the full, final, typeset and author-corrected version of record of the manuscript is available on our site with no access controls, subscription charges or pay-per-view fees (<http://bmjopen.bmj.com>).

If you have any questions on BMJ Open's open peer review process please email [info.bmjopen@bmj.com](mailto:info.bmjopen@bmj.com)

# BMJ Open

## Multicenter observational study on practice of ventilation in brain injured patients: the VENTIBRAIN study protocol

|                               |                                                                                                                                                                                                                                                                                                                             |
|-------------------------------|-----------------------------------------------------------------------------------------------------------------------------------------------------------------------------------------------------------------------------------------------------------------------------------------------------------------------------|
| Journal:                      | <i>BMJ Open</i>                                                                                                                                                                                                                                                                                                             |
| Manuscript ID                 | bmjopen-2020-047100                                                                                                                                                                                                                                                                                                         |
| Article Type:                 | Protocol                                                                                                                                                                                                                                                                                                                    |
| Date Submitted by the Author: | 19-Nov-2020                                                                                                                                                                                                                                                                                                                 |
| Complete List of Authors:     | Robba, Chiara; Ospedale Policlinico San Martino, Neurocritical Care Unit Citerio, Giuseppe; University of Milan-Bicocca, School of Medicine; ASST di Monza, Emergency and Urgency<br>Taccone, Fabio<br>Galimberti, Stefania; Università degli Studi di Milano-Bicocca, School of Medicine<br>Rebora, Paola<br>Pelosi, Paolo |
| Keywords:                     | Adult intensive & critical care < ANAESTHETICS, Neurological injury < NEUROLOGY, Neurophysiology < NEUROLOGY                                                                                                                                                                                                                |
|                               |                                                                                                                                                                                                                                                                                                                             |

SCHOLARONE™  
Manuscripts

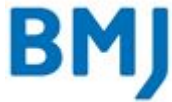

I, the Submitting Author has the right to grant and does grant on behalf of all authors of the Work (as defined in the below author licence), an exclusive licence and/or a non-exclusive licence for contributions from authors who are: i) UK Crown employees; ii) where BMJ has agreed a CC-BY licence shall apply, and/or iii) in accordance with the terms applicable for US Federal Government officers or employees acting as part of their official duties; on a worldwide, perpetual, irrevocable, royalty-free basis to BMJ Publishing Group Ltd ("BMJ") its licensees and where the relevant Journal is co-owned by BMJ to the co-owners of the Journal, to publish the Work in this journal and any other BMJ products and to exploit all rights, as set out in our [licence](#).

The Submitting Author accepts and understands that any supply made under these terms is made by BMJ to the Submitting Author unless you are acting as an employee on behalf of your employer or a postgraduate student of an affiliated institution which is paying any applicable article publishing charge ("APC") for Open Access articles. Where the Submitting Author wishes to make the Work available on an Open Access basis (and intends to pay the relevant APC), the terms of reuse of such Open Access shall be governed by a Creative Commons licence – details of these licences and which [Creative Commons](#) licence will apply to this Work are set out in our licence referred to above.

Other than as permitted in any relevant BMJ Author's Self Archiving Policies, I confirm this Work has not been accepted for publication elsewhere, is not being considered for publication elsewhere and does not duplicate material already published. I confirm all authors consent to publication of this Work and authorise the granting of this licence.

1  
2  
3  
4  
5  
6  
7  
8  
9  
10  
11  
12  
13  
14  
15  
16  
17  
18  
19  
20  
21  
22  
23  
24  
25  
26  
27  
28  
29  
30  
31  
32  
33  
34  
35  
36  
37  
38  
39  
40  
41  
42  
43  
44  
45  
46  
47  
48  
49  
50  
51  
52  
53  
54  
55  
56  
57  
58  
59  
60

# Multicenter observational study on practice of ventilation in brain injured patients: the VENTIBRAIN study protocol

Chiara Robba<sup>1a</sup>, Giuseppe Citerio<sup>2a</sup>, Fabio Silvio Taccone<sup>3</sup>, Stefania Galimberti<sup>4</sup>, Paola  
Rebora<sup>4</sup>, Paolo Pelosi<sup>5</sup>, core Steering committee for the VENTIBRAIN Steering  
committee\*

<sup>1</sup>San Martino Policlinico Hospital, IRCCS for Oncology and Neuroscience, Genoa, Italy

<sup>2</sup>School of Medicine and Surgery, University of Milano Bicocca, Milan, Italy. OrciID  
0000-0002-5374-3161

<sup>3</sup>Department of Intensive Care Medicine, Erasme Hospital, Université Libre de  
Bruxelles, Brussels, Belgium

<sup>4</sup>Bicocca Bioinformatics Biostatistics and Bioimaging B4 Center, School of Medicine  
and Surgery, University of Milano - Bicocca, Monza, Italy

<sup>5</sup>Department of Surgical Sciences and Integrated Diagnostics, University of Genoa,  
Genoa, Italy

<sup>a</sup>The authors have equally contributed

Corresponding author:

Chiara Robba, PhD

[kiarobba@gmail.com](mailto:kiarobba@gmail.com)

Policlinico San Martino, Genova, Italy

1  
2  
3  
4 \*VENTIBRAIN enlarged Steering committee:

5 Jordi Mancebo, Servei de Medicina Intensiva, Hospital de Sant Pau, Barcelona, Spain

6 Robert Stevens, Departments of Anesthesiology and Critical Care Medicine,  
7 Neurology, and Neurosurgery, Johns Hopkins University School of Medicine,  
8 Baltimore, MD

9  
10 Geert Meyfroidt, Department and Laboratory of Intensive Care Medicine, University  
11 Hospitals Leuven and KU Leuven, Herestraat 49, Box 7003 63, 3000 Leuven, Belgium

12 Mauro Oddo, Department of Intensive Care Medicine, Centre Hospitalier  
13 Universitaire Vaudois (CHUV), University of Lausanne, Switzerland

14 Rafael Badenes Department of Anesthesiology and Surgical-Trauma Intensive Care,  
15 Hospital Clinic Universitari de Valencia, Department of Surgery, University of  
16 Valencia, Valencia, Spain

17  
18 Valentina Della Torre, Intensive Care Unit, St Mary's Hospital, London, UK

19 Raimund Helbok Department of Neurology, Neurological Intensive Care Unit,  
20 Medical University of Innsbruck, Anichstrasse 35, 6020, Innsbruck, Austria.

21 Jose' Suarez Department of Anesthesiology and Critical Care Medicine, Neurology,  
22 and Neurosurgery, Johns Hopkins University School of Medicine, Baltimore, MD

23 Nino Stocchetti Department of Physiopathology and Transplantation, Milan  
24 University, Milan, Italy; Neuro Intensive Care Unit, Fondazione Erasmus Medical  
25 Center, Ca Granda Ospedale Maggiore Policlinico Milano, Milan, Italy

26 Marcelo Gama De Abreu Department of Anaesthesiology and Intensive Care  
27 Medicine, Pulmonary Engineering Group, University Hospital Carl Gustav Carus at  
28 the Technische Universität Dresden, Fetscherstr. 74, 01307, Dresden, Germany.

29 Marcus Schultz Department of Intensive Care Medicine and Laboratory of  
30 Experimental Intensive Care and Anesthesiology, Academic Medical Center,  
31 University of Amsterdam, Amsterdam, The Netherlands.

32 Ary Serpa Neto Department of Critical Care Medicine & Institute of Education and  
33 Research, Hospital Israelita Albert Einstein, São Paulo, Brazil.

34 Raphael Cinotti Department of Anaesthesia and Critical Care, Hôpital Guillaume et  
35 René Laennec, University Hospital of Nantes, Saint-Herblain, France

36 Louis Blanch Critical Care Center, Institut d'Investigació i Innovació Parc Taulí  
37 I3PT, Hospital Universitari Parc Taulí, Sabadell, Spain. lblanch@tauli.cat.

38 Centro de Investigación Biomédica en Red Enfermedades Respiratorias  
39 (CIBERES), Instituto de Salud Carlos III, Madrid, Spain. lblanch@tauli.ca

40 Giacomo Bellani Department of Health Sciences, School of Medicine and Surgery,  
41 University of Milano-Bicocca, Milan, Italy

42 Karim Asehnoune Department of Anaesthesia and Critical Care, Hôtel Dieu,  
43 University Hospital of Nantes, Nantes, France

44 Luigi Camporota Department of Adult Critical Care, Guy's and St Thomas' NHS  
45 Foundation Trust, Health Centre for Human and Applied Physiological Sciences,  
46 London, UK

47 Christian Putensen Department of Anaesthesiology and Intensive Care Medicine,  
48 University Clinical Center Bonn, Bonn, North Rhine-Westphalia, Germany

49 John Laffey School of Medicine, National University of Ireland Galway (NUIG),  
50 Galway, Ireland

## ABSTRACT

### Introduction

Mechanical ventilatory is a crucial element of acute brain injured patients' management. The ventilatory goals to ensure lung protection during acute respiratory failure may not be adequate in case of concomitant brain injury. Therefore, there are limited data from which physicians can draw conclusions regarding optimal ventilator management in this setting.

The aim of the "Multicenter observational study on practice of ventilation in brain injured patients"-the VENTIBRAIN study, is to describe the current practice of ventilator settings and mechanical ventilation in acute brain injured patients.

Secondary objectives include the description of ventilator settings among different countries, and their association with outcomes.

### Methods and analysis

The VENTIBRAIN Study is an international multicenter prospective observational cohort study. Inclusion criteria will be adult patients admitted to the intensive care unit (ICU) with a diagnosis of traumatic brain injury or cerebrovascular diseases (intracranial hemorrhage, subarachnoid hemorrhage, ischemic stroke), requiring intubation and mechanical ventilation in the ICU. Exclusion criteria will be the following: patients aged < 18 years; pregnant patients; patients not intubated or not mechanically ventilated or receiving only non-invasive ventilation; patients under invasive mechanical ventilation before inclusion. Data related to clinical

1  
2  
3 examination, neuromonitoring if available, ventilator settings and arterial blood  
4 gases will be recorded at admission and daily for the first 7 days from admission and  
5 then at day 10 and 14. The Glasgow Outcome Scale Data on mortality and  
6 neurological outcome (as for extended (GOSE)) will be collected at discharge from  
7 ICU, hospital and at 6 months follow-up.  
8  
9

### 10 11 12 **Ethics and dissemination**

13  
14 The study has been approved by the Ethic committee of Brianza at the Azienda Socio  
15 Sanitaria Territoriale (ASST)-Monza. Data will be disseminated to the scientific  
16 community by abstracts submitted to the European Society of Intensive Care  
17 Medicine annual conference and by original articles submitted to peer-reviewed  
18 journals.  
19  
20  
21  
22

23  
24  
25 **Trial registration number:** NCT04459884  
26  
27

28  
29  
30 **Keywords:** mechanical ventilation; brain injury; ventilator settings; outcome;  
31 Glasgow coma scale  
32  
33

### 34 35 36 37 **Strengths and limitations of the study**

- 38  
39  
40  
41  
42  
43  
44  
45  
46  
47  
48  
49  
50  
51  
52  
53  
54  
55  
56  
57  
58  
59  
60
- Results from this large multicenter study including mechanically ventilated acute brain injury patients admitted to the intensive care unit will provide a detailed description of the patients' characteristics, and ventilator strategies, and their association to clinical outcomes.
  - The main strength of this study relies on the global approach, since it allows to explore clinical practice in a wide number of geographical regions with different public health issues, including low- and middle-income countries
  - The main limitation of this study relies on the observational design with consequent difficulty to draw causal inferences.
  - However, the results from this study will generate hypothesis for respiratory management of acute brain injured patients and help in better study design plans for future randomized controlled trials.

**List of abbreviations and relevant definitions**

ABI Acute Brain Injury

ARDS Acute Respiratory Distress Syndrome

CA Competent Authority

COPD Chronic Obstructive Pulmonary Disease

CPP Cerebral Perfusion Pressure

CRF Case Report Form

CT Computerized Tomography

DSMB Data safety Managing Board

ESICM European Society of Intensive Care

GCP General Clinical Practice

GCS Glasgow Coma Scale

GOSE Extended Outcome Scale

ICP Intra Cranial Pressure

ICU Intensive Care Unit

ICH Intra Cerebral Hemorrhage

MAP Mean Arterial Pressure

MV Mechanical Ventilation

NC National Coordinator

PaO<sub>2</sub> Arterial Partial Pressure of Carbon DioxidePaO<sub>2</sub> Arterial Partial Pressure of OxygenPbO<sub>2</sub> Brain Tissue Oxygen Tension

PBW Predicted body weight

PEEP Positive End–expiratory Pressure

PI Principal Investigator

RM Recruitment Maneuvers

SAH – Subarachnoid Hemorrhage

SC Steering Committee

TCD Trans Cranial Doppler

TV Tidal Volume

VALI Ventilator–associated Lung Injury

WBP Personal Data Protection Act

WMO Medical Research Involving Human Subjects Act



## BACKGROUND AND RATIONALE

Mechanical ventilation (MV) is a frequently applied and often a life-saving strategy in severely brain injured patients.<sup>1</sup> Paradoxically, ventilation itself has the potential to cause further pulmonary and cerebral damage and can increase mortality and morbidity.<sup>2</sup> Several experimental and clinical studies have shown how brain injury can cause secondary lung injury.<sup>2-4</sup> Lung injury could be due either to mechanical ventilation, which is often necessary in brain injured patients, or to inflammatory response that follows primary acute brain injury.<sup>5</sup>

The so-called '*protective lung ventilation*' strategies include the use of low tidal volume (TV), positive end expiratory pressure (PEEP), and eventually recruitment maneuvers (RMs), and are aimed to prevent lung damage and to reduce morbidity and mortality in patients with acute respiratory distress syndrome (ARDS).<sup>6,7</sup> In particular, the use of low tidal volume seems to have the greater importance,<sup>8-11</sup> and it is recommended in critically ill patients with ARDS.<sup>12</sup>

Results from one multicenter randomized controlled trial suggest that also intensive care unit (ICU) patients without ARDS could benefit from '*protective lung ventilation strategies*'.<sup>13</sup> A recent meta-analysis showed a higher incidence of pulmonary complications and even increased mortality in patients who received '*conventional ventilation*' with traditionally sized or higher tidal volumes compared to patients undergoing protective strategies.<sup>14</sup>

Therefore, the concept of '*protective lung ventilation*' has shown to reduce morbidity and mortality of ICU patients with ARDS but seems also to have a

1  
2  
3 beneficial effect on patients with healthy lungs and in the perioperative settings.  
4  
5 However, these recommendations often come into conflict with the management of  
6  
7 patients affected by acute brain injury, because low tidal volumes, high PEEP and  
8  
9 RMs can increase carbon dioxide levels (CO<sub>2</sub>) and increase intrathoracic pressure,  
10  
11 thus having detrimental effects on intracranial pressure (ICP) and cerebral perfusion  
12  
13 pressure (CPP).<sup>15-17</sup> Because of this, brain injured patients have been traditionally  
14  
15 excluded from the major trials regarding mechanical ventilation. There is therefore  
16  
17 still uncertainty regarding the use of protective ventilation in brain injured ill  
18  
19 patients, and, as suggested by a recent consensus of experts,<sup>18</sup> a multicenter  
20  
21 international study on mechanical ventilation strategies in brain injured patients is  
22  
23 currently missing.

## 24 25 **METHODS**

### 26 27 **Study design**

28  
29 We designed a large international multicenter prospective observational cohort  
30  
31 study including mechanically ventilated brain injured patients and planned 6-month  
32  
33 follow-up.

### 34 35 36 **Objectives**

37  
38 Primary objective is to describe ventilation settings of intubated and mechanically  
39  
40 ventilated neurocritically ill patients admitted to the ICU.

41  
42 Secondary objectives are:

- 43  
44 - To describe the differences in ventilator settings among different countries.
- 45  
46 - To evaluate the association of ventilator settings with pulmonary complications  
47  
48 (including pneumonia, ARDS, neurogenic pulmonary edema)
- 49  
50 -To describe differences in the ventilator settings in presence/absence of high  
51  
52 intracranial pressure.
- 53  
54 - To evaluate the association of ventilator settings with outcomes

### 55 56 57 **Study population**

58  
59  
60

We will collect data of consecutive patients with acute brain injury requiring endotracheal intubation and mechanical ventilation, who are admitted to the intensive care unit (ICU).

#### **Inclusion criteria will be:**

- Age  $\geq$  18 years
- Patients admitted to the ICU with a diagnosis of a primary non-anoxic brain injury, such as:
  - Traumatic brain injury (TBI)
  - Cerebrovascular diseases (intracranial hemorrhage, ICH; subarachnoid hemorrhage, SAH; acute ischemic stroke, AIS)
- Patients requiring intubation and mechanical ventilation in the ICU

#### **Exclusion criteria**

- Age < 18 years
- Pregnant patients
- Patients not intubated or not mechanically ventilated or receiving only non-invasive ventilation (i.e., patient never received invasive ventilation during the present admission)
- Patients under invasive mechanical ventilation before the 7-day period of inclusion

#### **Outcomes**

Enrolled patients will be followed until ICU-hospital discharge or death, whatever comes first.

Outcomes will be assessed as:

- 6-months mortality and neurological outcome (as for extended Glasgow Outcome Scale, GOSE).
- Pulmonary complications
- In-hospital and ICU mortality.

1  
2  
3 -Hospital length of stay (LOS).  
4  
5 - Duration of mechanical ventilation (in days), ventilator free days (days) at ICU  
6  
7 discharge.  
8  
9

### 10 **Study procedures and settings**

11 The protocol has been endorsed by the European Society of Intensive Care (ESICM):  
12 Worldwide, more than 200 centers from 56 countries have been contacted to  
13 participate in the VENTIBRAIN study (more information at  
14 <https://www.esicm.org/research/trials/endorsed-trials/ongoing-projects->  
15 [endorsed/](https://www.esicm.org/research/trials/endorsed-trials/ongoing-projects-)).  
16  
17

18 The established recruitment window will open at the beginning of 2021. The  
19 inclusion period will be flexible for participating centers and determined at a later  
20 stage together with the study–coordinator. Centers will enroll consecutive patients  
21 for a minimum period of 3 months to a maximum period of 6 months.  
22

23 Patients in participating centers will be screened on a daily basis. After 6 months  
24 from recruitment, the patients or their family members will be contacted by phone  
25 for the follow-up evaluation.  
26  
27

### 28 **Data collection**

29 The following data will be collected at admission, and daily until day 7, and then at  
30 day 10 and 14:  
31

- 32 • Demographic data and baseline clinical data, including neurological,  
33 neuroradiological and respiratory severity scores (Table 1-4), neuromonitoring  
34 data, and the occurrence of neurological and systemic complications
  - 35 • Ventilation settings, gas exchange variables and vital parameters
  - 36 • Chest radiography data from available chest X–rays and/or Computed  
37 Tomography (i.e., no extra chest X–rays are obtained)
  - 38 • Therapy Intensity Levels (TILs) and predefined complications recorded from  
39 medical chart (Table 5)
- 40  
41  
42  
43  
44  
45  
46  
47  
48  
49  
50  
51  
52  
53  
54  
55  
56  
57  
58  
59  
60

1  
2  
3 At ICU discharge data on mortality, length of stay (days) duration of mechanical  
4 ventilation (in days), ventilator free days (days) will be collected

5  
6  
7 At 6-months mortality and neurological outcome (as for extended Glasgow Outcome  
8 Scale, GOSE, Table 6), length of stay (in days), in hospital mortality will be collected  
9

10  
11  
12 The GOSE at 6 months follow-up will be collected via phone-structured interviews to  
13 the patients and/or family members using a validated questionnaire. <sup>19</sup>Data on the  
14 cause and date of death will be also collected.  
15  
16

### 17 18 19 20 **Data management**

21 Anonymized data will be collected in a web-based electronic Case-Report Form  
22 (eCRF) and protected by encryption software and password provided to single users.  
23 Each patient will be associated to a numeric code generated by the central database.  
24 Data will be checked for consistency and completeness by the study coordinator and  
25 the core Steering Committee, to ensure the high quality of the collected data before  
26 the analysis and to limit the rate of errors and missing data.  
27  
28

29 The data will be securely stored at the University Milano-Bicocca; all procedures will  
30 comply with the EU Regulation 2016/679 on the protection of natural persons  
31 regarding personal data processing and movement. A Data Transfer Agreement to  
32 confirm the terms for data transfer from the centers to the Sponsor will be finalized.  
33 Patients' demographic characteristics, co-morbidities, diagnosis, timing of acute  
34 events and clinical presentation of acute brain injury will be extracted from the  
35 patients' medical records.  
36  
37  
38  
39  
40  
41  
42  
43  
44  
45  
46

## 47 **STATISTICAL ANALYSIS**

### 48 **Sample size calculation**

49 Since the hypotheses of the study are exploratory, no formal sample size calculation  
50 has not been performed. This international prospective observational study aims to  
51 recruit more than 4000 patients in coma after acute brain damage admitted to >200  
52 Intensive Care Units (ICUs) in at least 50 countries. Recruitment will last 3-6 months  
53 at each center, aiming to enroll about 30 consecutive patients/center. The number  
54  
55  
56  
57  
58  
59  
60

of enrolled patients and ICUs reflects is considered adequate to capture the range of variation in ventilator settings observed in the clinical practice. We aim to include also low-middle income countries, in order to have a representation of the variability worldwide.

### **Plan of analysis**

Patient and ventilation characteristics will be described by means (standard deviation), medians (I-III quartiles) and proportions, as appropriate. The different ventilator settings will be described according to type of brain injury and countries.

The association between ventilator settings and outcomes will be evaluated by appropriate multivariable models adjusting for relevant confounders. Cox model will be applied to time to event outcomes (e.g., mortality) and logistic regression to dichotomous outcomes (e.g. poor neurological outcome at 6 month (GOSE <5), pulmonary complications). The heterogeneity induced by centers/nations will be eventually accounted for, in the regression models, through random effects.

The cumulative incidence in time of pulmonary complications during hospital stay will be estimated along with 95% confidence intervals accounting for mortality and discharge as competing events.

The occurrence of raised intracranial pressure (ICP value lasting more than 5 minutes >20 mmHg) will be described daily and ventilator setting preceding it will be described. A longitudinal model on raised intracranial pressure by time evaluating the possible impact of ventilator settings will be also applied adjusting for relevant confounders.

Statistical analyses will be conducted using R.

### **Patient and Public Involvement**

No patient involved.

## **ETHICAL CONSIDERATIONS**

### **Ethical standards**

The PI and Steering Committee will ensure that this study is conducted in full conformity with the Declaration of Helsinki and Good Clinical Practices.

### **Ethics committee**

Each NC/PI will notify the relevant ethics committee, in compliance with the local legislation and rules. The national coordinators will facilitate this process. The approval of the protocol (if required by local authorities) must be obtained before any participant is enrolled. Any amendment to the protocol will require review and approval by the SC before the changes are implemented to the study.

### **Lack of capacity and Delayed Consent**

Informed consent will be obtained from patients with no lack of capacity. For patients not able to provide informed consent at the time of recruitment, the responsible clinical/research staff will act as Consulter and consent eligible patients after discussion with the next- of-kin. If the patient has a Power of Attorney or a Legal tutor or an, he/she will act as Consultee and will be asked to consent/decline participation to the study on legal behalf of the patient.

In presence of patients' Advance Decision Plan, including participation in research studies, the Plan will be respected and recruitment pursued/abandoned accordingly. At follow-up, patients who have regained capacity will be asked to provide Informed Consent and will be given the possibility to:

- Provide Informed Consent for the acute data and follow-up.
- Deny research participation and request destruction of acute data collected.

### **Publication and data sharing policy**

#### **Data sharing policy**

After the publication of the main papers, any requests for the use of the data will be made to the VENTIBRAIN Core Steering Committee (CR, GC, PP, FST), and decisions will be made in relation to these requests. The VENTIBRAIN investigators will have priority in requests to use the data set for subsequent studies.

#### **Publication and Authorship**

Data will be made available to the scientific community by means of abstract by scientific papers submitted to peer-reviewed journals. Authorship of the main manuscript will follow the ICMJE recommendations that base authorship on the

1  
2  
3 following 4 criteria:

- 4  
5 • Substantial contributions to the conception or design of the work; or the  
6 acquisition, analysis, or interpretation of data for the work; AND  
7  
8 • Drafting the work or revising it critically for important intellectual content; AND  
9  
10 • Final approval of the version to be published; AND  
11  
12 • Agreement to be accountable for all aspects of the work in ensuring that questions  
13 related to the accuracy or integrity of any part of the work are appropriately  
14 investigated and resolved.  
15  
16

17  
18 A writing committee composed by the Core Steering Committee, biostatisticians and  
19 selected members of the advisory board will draft the manuscript and will be author  
20 of the manuscript. National coordinators will be authors if they will fulfill the ICMJE  
21 criteria and if they will promote the enrolment of at least 300 patients in their  
22 country. All the participant centers will be granted in the group authorship,  
23 “VENTIBRAIN”. The corresponding author will specify the group name and will clearly  
24 identify the group members who can take credit and responsibility for the work as  
25 collaborators. For each center, a participant will be indicated in the  
26 group authorship list every 50 patients enrolled. The ESICM support will be  
27 acknowledged in each publication generated from the study. In the main  
28 manuscripts, CR and GC will share the first authorship, FST will be the third author,  
29 and PP will be the last author. After publication of the primary results, on request  
30 the pooled dataset will be available for all members of the VENTIBRAIN collaborators  
31 for preplanned substudies and secondary analysis, after judgement and approval of  
32 scientific quality and validity statement guidelines and checklists. Each secondary  
33 analysis or substudy approved will have to include the core Steering Committee as  
34 authors. Preplanned analysis include the evaluation of blood gas values (such as  
35 oxygen and carbon dioxide) and their association with patient’s outcome, and the  
36 assessment of mechanical power used in this cohort of patients and its effect on  
37 outcomes.  
38  
39  
40  
41  
42  
43  
44  
45  
46  
47  
48  
49  
50  
51  
52  
53  
54  
55

## 56 **DISCUSSION AND EXPECTED IMPACT OF THE STUDY**

57  
58 VENTIBRAIN is designed to obtain a detailed description of patient’s characteristics,  
59  
60



1  
2  
3 management strategies resource use and association with clinical outcomes across  
4 many centers/countries. In particular, the study will provide insights in relation to  
5 clinical management, monitoring and treatment, practice variation in neuro-  
6 intensive care units around the world, differences in the ventilator management of  
7 brain injured patients and their potential association with outcome.  
8  
9  
10  
11  
12

13 VENTIBRAIN has several strengths. First, its prospective design will increase the  
14 accuracy of data collection with potential minimization of the chance of residual  
15 confounding by unmeasured variables, which is a common limitation of  
16 retrospective design. Second, we aim to obtain a large sample size, able to provide  
17 information on neurological and systemic complications in mechanically ventilated  
18 brain injured patients, and eventually evaluate potential associations between  
19 ventilator settings and ICU/ 6 months patients' outcomes. Third, the inclusion of a  
20 large number of patients from different centers (dedicated and not dedicated  
21 neuroICUs), and countries, including low-income countries will provide information  
22 on geoeconomic differences in epidemiology, management strategies and outcomes  
23 of mechanically ventilated brain injured patients.  
24  
25  
26  
27  
28  
29  
30  
31  
32  
33  
34

35 The need to particularly focus on the mechanical ventilator settings in this group of  
36 patients is related to the specific ventilator needs of brain injured patients.<sup>18,20,21</sup>  
37 Brain injured patients have a high number of pulmonary complications, ventilator  
38 associated pneumonia (VAP), and a high rate of need of tracheostomy and  
39 extubation failure.<sup>22</sup>  
40  
41  
42  
43

44 The optimal oxygenation and carbon dioxide targets are not clear in this population.  
45 Hypoxia has been largely recognized as a major cause of secondary brain injury;  
46 recently, also hyperoxia has shown to have potential detrimental effects on patients'  
47 outcome.<sup>23,24</sup>  
48  
49  
50

51 Similarly, hypercapnia can cause cerebral vasodilation and increase intracranial  
52 pressure and should therefore be avoided, but hypocapnia and cerebral  
53 vasoconstriction can lead to cerebral ischemia and currently it is suggested only in  
54 case of life-threatening intracranial hypertension and risk of brain herniation.<sup>25,26</sup>  
55  
56  
57  
58  
59  
60

All in it, ventilator targets are unclear in this group of patients.

1  
2  
3  
4  
5 Moreover, the general principles and ventilator settings applied in the general  
6 population have not been established in brain injured patients.<sup>19</sup>

7  
8 Recent literature has highlighted the importance of protective ventilation in ARDS  
9 and non ARDS patients,<sup>27-32</sup> as well as weaning protocols. However, country-specific  
10 practices, the lack of clear guidelines in the neuroICU population or different  
11 resources among countries may affect the implementation of all these interventions.  
12  
13  
14  
15

16  
17  
18 Protective ventilator strategies such as high PEEP or recruitment maneuvers with  
19 increased intrathoracic pressure and consequent jugular outflow reduction and  
20 intracranial hypertension;<sup>33</sup> low tidal volume and permissive hypercapnia may be  
21 contraindicated in this group of patients, and rescue therapies used in ARDS patients  
22 such as prone position can be contraindicated for the risk of increased ICP and  
23 neuromonitoring tools displacement and extracorporeal membrane oxygenation  
24 (ECMO) can be contraindicated for the risk of haemorrhage.<sup>34</sup> However, although  
25 these patients have been traditionally ventilated with high tidal volumes and low  
26 PEEP,<sup>29</sup> recent evidence suggests that the concept of protective ventilation is gaining  
27 interest even in the brain injured population.<sup>19</sup>  
28  
29  
30  
31  
32  
33  
34  
35  
36  
37

38 Results from the VENTIBRAIN study will allow to clarify the current status of the  
39 ventilator management of these patients, and in particular to discriminate the  
40 effects of tidal volume, PEEP and driving pressure on outcomes in brain injured  
41 patients with, at risk of, or without ARDS (using predefined scores), and the use of  
42 specific settings in case of intracranial hypertension. The VENTIBRAIN study offers a  
43 unique opportunity to globally uniform clinical guidelines regarding ventilator  
44 strategies in brain injured patients and eventually improving their outcome.  
45  
46  
47  
48  
49  
50

51  
52 The VENTIBRAIN study has also several limitations that need to be addressed. First,  
53 we cannot exclude that ventilator settings and targets used by clinicians might be  
54 biased by the participation in the study, thus reducing the ability of VENTIBRAIN to  
55 represent the real ICU care of these patients. Second, the CRF designed for  
56 VENTIBRAIN was aimed to not cause excessive workload for the participating  
57  
58  
59  
60

1  
2  
3 centres. Therefore, some data regarding systemic complications will be potentially  
4 missing, while continuous data on respiratory and neuromonitoring might be  
5 incomplete. Similarly, due to the limited number of daily arterial blood gases and  
6 ventilator settings data collection, we will have a limited dataset that might not  
7 reflect completely real clinical practice.  
8  
9  
10  
11

12  
13 Finally, the observational nature of VENTIBRAIN makes impossible to draw causal  
14 inferences between ventilator management and outcome in this group of patients.  
15 However, VENTIBRAIN is aimed to generate hypothesis for treatment effects and  
16 pave the way to design future randomized controlled trials of ventilation in these  
17 settings to draw causal inferences and improve clinical outcomes in ventilated brain  
18 injured patients.  
19  
20  
21  
22  
23  
24  
25

## 26 **CONCLUSIONS**

27  
28 VENTIBRAIN is designed to assess and describe the clinical practice in ventilator  
29 strategies in critically ill brain injured patients in a large number of different  
30 countries/centers worldwide. Results from this study will help to identify differences  
31 in clinical practices and could be used to plan new trials on mechanical ventilation in  
32 this specific subgroup of patients.  
33  
34  
35  
36  
37  
38  
39

## 40 **Figures headings:**

41  
42 Figure 1. Timetable of the study.  
43  
44  
45  
46  
47  
48  
49  
50  
51  
52  
53

54  
55 **Contributors:** CR, GC, FST, PP were equally responsible for writing of  
56 the manuscript and participated in study design. CR drafted the first version of the  
57 manuscript. FST, PP, GC, SG, PR reviewed the manuscript and agreed with  
58  
59  
60

1  
2  
3 submission.

4  
5 **Funding:** This research received no specific grant from any funding agency in the  
6 public, commercial or not-for profit sectors.

7  
8 **Competing interests:** None declared.

9  
10 Patient consent: Not required.  
11  
12  
13  
14  
15  
16  
17  
18  
19  
20  
21  
22  
23  
24  
25  
26  
27  
28  
29  
30  
31  
32  
33  
34  
35  
36  
37  
38  
39  
40  
41  
42  
43  
44  
45  
46  
47  
48  
49  
50  
51  
52  
53  
54  
55  
56  
57  
58  
59  
60

For peer review only

## References

1. Borsellino B, Schultz MJ, Gama de Abreu M et al. Mechanical ventilation in neurocritical care patients: a systematic literature review. *Expert Rev Respir Med* 2016 Oct;10(10):1123-32.
2. Slutsky AS. Lung injury caused by mechanical ventilation. *Chest* 1999;116:9S-15S.
3. Robba C, Bonatti G, Battaglini D et al. Mechanical ventilation in patients with acute ischaemic stroke: from pathophysiology to clinical practice. *Care* 2019 Dec 2;23(1):388.
4. Samary CS, Ramos AB, Maia LA et al. Focal ischemic stroke leads to lung injury and reduces alveolar macrophage phagocytic capability in rats. *Crit Care* 2018 Oct 5;22(1):249.
5. Heuer JF, Pelosi P, Hermann P et al. Acute effects of intracranial hypertension and ARDS on pulmonary and neuronal damage: a randomized experimental study in pigs. *Intensive Care Med*. 2011 Jul;37(7):1182-91.
6. Putensen C, Theuerkauf N, Zinserling J et al. Meta-analysis: ventilation strategies and outcomes of the acute respiratory distress syndrome and acute lung injury. *Ann Intern Med* 2009;151:566-576.
7. Saddy F, Sutherasan Y, Rocco PR et al. Ventilator-associated lung injury during assisted mechanical ventilation. *Semin Respir Crit Care Med* 2014 Aug;35(4):409-17.
8. Esteban A, Ferguson ND, Meade MO, et al. Evolution of mechanical ventilation in response to clinical research. *Am J Respir Crit Care Med* 2008;177:170-177.
9. Matthay MA, Ware LB, Zimmerman GA. The acute respiratory distress syndrome. *J Clin Invest* 2012;122:2731-2740.
10. Needham DM, Colantuoni E, Mendez-Tellez PA et al. Lung protective mechanical ventilation and two year survival in patients with acute lung injury: prospective cohort study. *BMJ* 2012;344:e2124.
11. Sage M, See W, Nault S et al. Effect of Low Versus High Tidal-Volume Total Liquid Ventilation on Pulmonary Inflammation. *Front Physiol*. 2020 Jun 18;11:603.
12. Dellinger RP, Levy MM, Rhodes A, et al. Surviving sepsis campaign: international guidelines for management of severe sepsis and septic shock: 2012. *Crit Care Med* 2013;41:580-637.

- 1  
2  
3  
4  
5  
6  
7  
8  
9  
10  
11  
12  
13  
14  
15  
16  
17  
18  
19  
20  
21  
22  
23  
24  
25  
26  
27  
28  
29  
30  
31  
32  
33  
34  
35  
36  
37  
38  
39  
40  
41  
42  
43  
44  
45  
46  
47  
48  
49  
50  
51  
52  
53  
54  
55  
56  
57  
58  
59  
60
13. Determann RM, Royakkers A, Wolthuis EK et al. Ventilation with lower tidal volumes as compared with conventional tidal volumes for patients without acute lung injury: a preventive randomized controlled trial. *Crit Care* 2010;14:R1.
14. Serpa Neto A, Cardoso SO, Manetta JA et al. Association between use of lung-protective ventilation with lower tidal volumes and clinical outcomes among patients without acute respiratory distress syndrome: a meta-analysis. *JAMA* 2012;308:1651-1659. PELOSI - THIS IS AN OLD METAANALYSIS ....THAN CAN BE CERTAINLY BE QUOTED – consider also our metaanalysis with Yuda Sutherasan on Crit Care on protective ventilation in non ARDS !
15. Stevens RD, Lazaridis C, Chalela JA. The role of mechanical ventilation in acute brain injury. *Neurologic clinics*. 2008; 26: 543-563
16. Cinotti R, Bouras M, Roquilly A, Asehnoune K Management and weaning from mechanical ventilation in neurologic patients. *Annals of translational medicine* 2019; 6: 381
17. Della Torre V, Badenes R, Corradi F et al. Acute respiratory distress syndrome in traumatic brain injury: how do we manage it? *J Thorac Dis*. 2017 Dec;9(12):5368-5381
18. Robba C, Poole D, McNett M et al. Recommendations on Mechanical Ventilation in Acute Brain Injured Patients: Results of a European Society of Intensive Care Medicine and Neurocritical Care Society Consensus. *Intensive Care Med* 2020, in press
19. Wilson JT, Pettigrew LE, Teasdale GM. Structured interviews for the Glasgow Outcome Scale and the extended Glasgow Outcome Scale: guidelines for their use. *J Neurotrauma* 1998;15:573–85
20. Asehnoune K, Roquilly A and Cinotti R Respiratory Management in Patients with Severe Brain Injury. *Crit Care* 2018; 22: 76.
21. Frisvold SK, Robba C, Guérin C. What respiratory targets should be recommended in patients with brain injury and respiratory failure? *Intensive Care Med*. 2019
22. Pelosi P, Ferguson ND, Frutos-Vivar F, et al. Management and outcome of mechanically ventilated neurologic patients. *Crit Care Med* 2011; 39: 1482–92
23. Koutsoukou A, Perraki H, Raftopoulou A, et al. Respiratory mechanics in brain-damaged patients. *Intensive Care Med* 2006; 32: 1947-1954

- 1  
2  
3 24. Nortje J, Coles JP, Timofeev I et al. Effect of hyperoxia on regional oxygenation  
4 and metabolism after severe traumatic brain injury: preliminary findings. *Crit Care*  
5 *Med* 2008; 36: 273-281  
6  
7  
8 25. Hawryluk GW, Aguilera S, Buki A, et al. A management algorithm for patients  
9 with intracranial pressure monitoring: the Seattle International Severe Traumatic  
10 Brain Injury Consensus Conference (SIBICC). *Intensive Care Med* 2019;45(12):1783-  
11 1794  
12  
13  
14 26 Carney N, Totten AM, O'Reilly C, et al. Guidelines for the Management of Severe  
15 Traumatic Brain Injury, Fourth Edition. *Neurosurgery*. 2017, 1;80(1):6-15.  
16  
17  
18 27. Karalapillai D, Weinberg L, Peyton P, et al. Effect of Intraoperative Low Tidal  
19 Volume vs Conventional Tidal Volume on Postoperative Pulmonary  
20 Complications in Patients Undergoing Major Surgery: A Randomized Clinical  
21 Trial.  
22  
23 *JAMA*. 2020 Sep 1;324(9):848-858. doi: 10.1001/jama.2020.12866.  
24  
25  
26 28. Serpa Neto A, Simonis FD, Barbas CS, et al. Association between tidal  
27 volume size, duration of ventilation, and sedation needs in patients without  
28 acute respiratory distress syndrome: an individual patient data meta-analysis.  
29 *Intensive Care Med*. 2014 Jul;40(7):950-7.  
30  
31  
32 29. Caricato A, Conti G, Della Corte F, et al. Effects of PEEP on the intracranial system  
33 of patients with head injury and subarachnoid hemorrhage: the role of respiratory  
34 system compliance. *J Trauma* 2005; 58: 571-576  
35  
36  
37 30. Robba C, Ortu A, Bilotta F et al. Extracorporeal membrane oxygenation for adult  
38 respiratory distress syndrome in trauma patients: A case series and systematic  
39 literature review. *J Trauma Acute Care Surg*. 2017 Jan;82(1):165-173.  
40  
41  
42 31. Tejerina E, Pelosi P, Muriel A, et al. for VENTILA group. Association between  
43 ventilatory settings and development of acute respiratory distress syndrome in  
44 mechanically ventilated patients due to brain injury. *J Crit Care*. 2017  
45  
46  
47 32. Neto AS, Barbas CSV, Simonis FD et al. PROVENT; PROVE Network investigators.  
48 Epidemiological characteristics, practice of ventilation, and clinical outcome in  
49 patients at risk of acute respiratory distress syndrome in intensive care units from 16  
50 countries (PROVENT): an international, multicentre, prospective study. *Lancet Respir*  
51 *Med*. 2016 Nov;4(11):882-893.  
52  
53  
54 33. Simonis FD, Serpa Neto A, Binnekade JM et al. Writing Group for the PReVENT  
55 Investigators, Effect of a Low vs Intermediate Tidal Volume Strategy on Ventilator-  
56 Free Days in Intensive Care Unit Patients Without ARDS: A Randomized Clinical Trial.  
57 *JAMA*. 2018 Nov 13;320(18):1872-1880. doi:  
58  
59  
60

1  
2  
3 34. Serpa Neto A, Hemmes SN, Barbas CS, et al. PROVE Network  
4 Investigators. Protective versus Conventional Ventilation for Surgery: A Systematic  
5 Review and Individual Patient Data Meta-analysis. *Anesthesiology*. 2015  
6 Jul;123(1):66-78.  
7  
8  
9  
10  
11  
12  
13

## 14 Tables

15  
16  
17 Table 1. The Berlin Definition of ARDS. Abbreviations: ARDS, acute respiratory  
18 distress syndrome; CPAP, continuous positive airway pressure; FiO<sub>2</sub>, fractional  
19 inspired oxygen; PaO<sub>2</sub>, arterial oxygen tension; PEEP, positive end-expiratory  
20 pressure.  
21  
22

| 23 Criteria                        | 24 Definition                                                                                                                                                                                           |                                                                                                     |                                                                                             |
|------------------------------------|---------------------------------------------------------------------------------------------------------------------------------------------------------------------------------------------------------|-----------------------------------------------------------------------------------------------------|---------------------------------------------------------------------------------------------|
| 25 Cause                           | 26 Respiratory failure not fully explained by cardiac failure or fluid overload;<br>27 need objective assessment to exclude hydrostatic oedema if no risk factors<br>28 present (eg, echocardiography). |                                                                                                     |                                                                                             |
| 29 Timing                          | 30 Within 1 week of a known clinical insult or new/worsening respiratory<br>31 symptoms.                                                                                                                |                                                                                                     |                                                                                             |
| 32 Chest imaging<br>(Rx or CTscan) | 33 Bilateral opacities not fully explained by effusions, lobar/lung collapse or<br>34 nodules.                                                                                                          |                                                                                                     |                                                                                             |
| 35 Oxygenation                     | 36 Mild<br>37 200 < PaO <sub>2</sub> /FiO <sub>2</sub> ≤ 300<br>38 PEEP or CPAP ≥ 5 cm<br>39 H <sub>2</sub> O                                                                                           | 40 Moderate<br>41 100 < PaO <sub>2</sub> /FiO <sub>2</sub> ≤ 200<br>42 PEEP ≥ 5 cm H <sub>2</sub> O | 43 Severe<br>44 PaO <sub>2</sub> /FiO <sub>2</sub> ≤ 100<br>45 PEEP ≥ 5 cm H <sub>2</sub> O |



Table 2. Glasgow Coma Scale

|        | 1                  | 2                                                   | 3                                                          | 4                                       | 5                            | 6              |
|--------|--------------------|-----------------------------------------------------|------------------------------------------------------------|-----------------------------------------|------------------------------|----------------|
| Eyes   | Does not open eyes | Opens eyes in response to pain                      | Opens eyes in response to voice                            | Opens eyes spontaneously                | N/A                          | N/A            |
| Verbal | Makes no sounds    | Makes sounds                                        | Words                                                      | Confused, disoriented                   | Oriented, converses normally | N/A            |
| Motor  | Makes no movements | Extension to painful stimuli (decerebrate response) | Abnormal flexion to painful stimuli (decorticate response) | Flexion / Withdrawal to painful stimuli | Localizes to painful stimuli | Obeys commands |

Table 3. Marshall classification of traumatic brain injury

|                                                    |                                                                                                                                                                                                                  |
|----------------------------------------------------|------------------------------------------------------------------------------------------------------------------------------------------------------------------------------------------------------------------|
| <b>Diffuse injury I<br/>(no visible pathology)</b> | <ul style="list-style-type: none"> <li>no visible intracranial pathology</li> </ul>                                                                                                                              |
| <b>Diffuse injury II<br/>(swelling)</b>            | <ul style="list-style-type: none"> <li>midline shift of 0 to 5 mm</li> <li>basal cisterns remain visible</li> <li>no high or mixed density lesions <math>&gt;25 \text{ cm}^3</math></li> </ul>                   |
| <b>Diffuse injury III</b>                          | <ul style="list-style-type: none"> <li>midline shift of 0 to 5 mm</li> <li>basal cisterns compressed or completely effaced</li> <li>no high or mixed density lesions <math>&gt;25 \text{ cm}^3</math></li> </ul> |
| <b>Diffuse injury IV<br/>(shift)</b>               | <ul style="list-style-type: none"> <li>midline shift <math>&gt;5 \text{ mm}</math></li> <li>no high or mixed density lesions <math>&gt;25 \text{ cm}^3</math></li> </ul>                                         |
| <b>Evacuated mass lesion V</b>                     | <ul style="list-style-type: none"> <li>any lesion evacuated surgically</li> </ul>                                                                                                                                |
| <b>Non-evacuated mass lesion VI</b>                | <ul style="list-style-type: none"> <li>high or mixed density lesions <math>&gt;25 \text{ cm}^3</math></li> <li>not surgically evacuated</li> </ul>                                                               |

Table 4. Fisher scale.

|                |                                                                                                                                                                                       |
|----------------|---------------------------------------------------------------------------------------------------------------------------------------------------------------------------------------|
| <b>Grade 1</b> | <ul style="list-style-type: none"> <li>• no subarachnoid (SAH) or intraventricular hemorrhage (IVH) detected</li> <li>• incidence of symptomatic vasospasm: 21%</li> </ul>            |
| <b>Grade 2</b> | <ul style="list-style-type: none"> <li>• diffuse thin (&lt;1 mm) SAH</li> <li>• no clots</li> <li>• incidence of symptomatic vasospasm: 25%</li> </ul>                                |
| <b>Grade 3</b> | <ul style="list-style-type: none"> <li>• localized clots and/or layers of blood &gt;1 mm in thickness</li> <li>• no IVH</li> <li>• incidence of symptomatic vasospasm: 37%</li> </ul> |
| <b>Grade 4</b> | <ul style="list-style-type: none"> <li>• diffuse or no SAH</li> <li>• ICH or IVH present</li> <li>• incidence of symptomatic vasospasm: 31%</li> </ul>                                |

Table 5. Therapy intensity Level Scale

| ITEM                                | DETAILS                                                                     | SPECIFICS             | SCORE | MAX |
|-------------------------------------|-----------------------------------------------------------------------------|-----------------------|-------|-----|
| Positioning                         | head elevation for ICP control                                              |                       | 1     | 1   |
|                                     | nursed flat (180°) for CPP management                                       |                       | 1     |     |
| Sedation and neuromuscular blockade | low dose sedation (as required for mechanical ventilation)                  |                       | 1     | 8   |
|                                     | higher dose sedation for ICP control (but not aiming for burst suppression) |                       | 2     |     |
|                                     | high dose propofol or barbiturates for ICP control (metabolic suppression)  |                       | 5     |     |
|                                     | neuromuscular blockade (paralysis)                                          |                       | 3     |     |
| CSF drainage                        | CSF drainage – low volume                                                   | < 120ml/day (< 5ml/h) | 2     | 3   |
|                                     | CSF drainage – high volume                                                  | ≥ 120ml/day (≥ 5ml/h) | 3     |     |
| CPP management                      | fluid loading for maintenance of cerebral perfusion                         |                       | 1     | 2   |
|                                     | vasopressor therapy required for management of cerebral perfusion           |                       | 1     |     |
| Ventilatory management              | mild hypocapnia for ICP control, based on arterial CO <sub>2</sub> in mmHg  | ≥ 35, < 40            | 1     | 4   |
|                                     | moderate hypocapnia for ICP control                                         | ≥ 30, < 35            | 2     |     |
|                                     | intensive hypocapnia for ICP control                                        | < 30                  | 4     |     |
| Hyperosmolar therapy                | mannitol                                                                    | ≤ 2g/kg/24h           | 2     | 6   |
|                                     | mannitol                                                                    | > 2g/kg/24h           | 3     |     |
|                                     | hypertonic saline                                                           | ≤ 0.3g/kg/24h         | 2     |     |
|                                     | hypertonic saline                                                           | > 0.3g/kg/24h         | 3     |     |
|                                     |                                                                             |                       |       |     |

|  |                                                                                           |  |   |    |
|--|-------------------------------------------------------------------------------------------|--|---|----|
|  | treatment of fever ( $T > 38^{\circ}\text{C}$ or spontaneous $T < 34.5^{\circ}\text{C}$ ) |  | 1 |    |
|  | cooling for ICP control, $\geq 35^{\circ}\text{C}$                                        |  | 2 |    |
|  | hypothermia $< 35^{\circ}\text{C}$                                                        |  | 5 |    |
|  | intracranial operation for progressive mass lesion, NOT scheduled on admission            |  | 4 |    |
|  | decompressive craniectomy                                                                 |  | 5 |    |
|  | Maximum total possible score                                                              |  |   | 38 |

Table 6. Extended Glasgow Outcome Scale

| Category number | Name                               | Definition                                                                                 |
|-----------------|------------------------------------|--------------------------------------------------------------------------------------------|
| 5               | <b>Good recovery</b>               | resumption of normal life (minor neurological or psychological deficits)                   |
| 4               | <b>Moderate disability</b>         | disabled but independent for daily life; work capacity is reduced                          |
| 3               | <b>Sever disability</b>            | conscious but dependent for daily life; unable to travel or go shopping without assistance |
| 2               | <b>Persistent vegetative state</b> | unresponsive and speechless                                                                |
| 1               | <b>Death</b>                       |                                                                                            |

1  
2  
3  
4  
5  
6  
7  
8  
9  
10  
11  
12  
13  
14  
15  
16  
17  
18  
19  
20  
21  
22  
23  
24  
25  
26  
27  
28  
29  
30  
31  
32  
33  
34  
35  
36  
37  
38  
39  
40  
41  
42  
43  
44  
45  
46  
47  
48  
49  
50  
51  
52  
53  
54  
55  
56  
57  
58  
59  
60

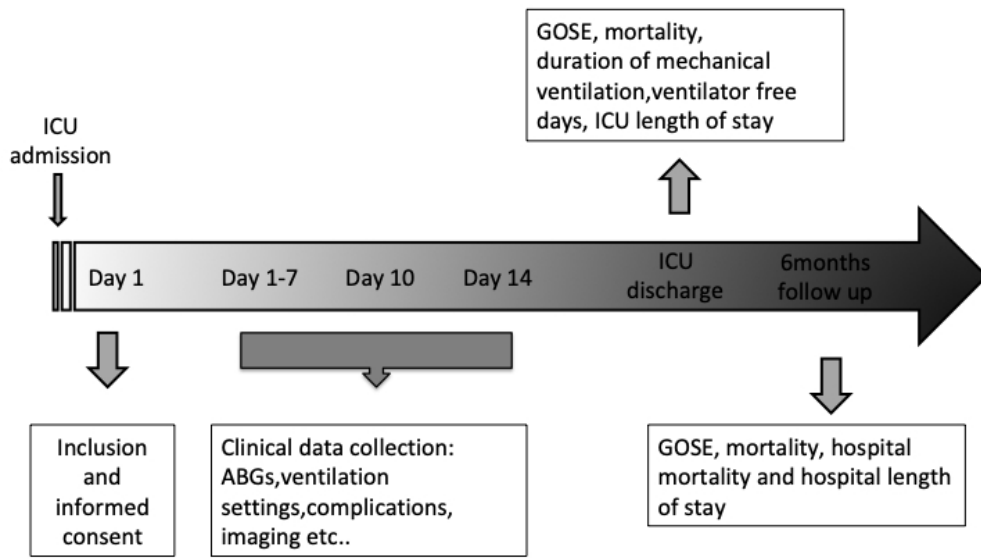

254x190mm (72 x 72 DPI)

# BMJ Open

## Multicenter observational study on practice of ventilation in brain injured patients: the VENTIBRAIN study protocol

|                                 |                                                                                                                                                                                                                                                                                                                                                                                                                                                                                                                                    |
|---------------------------------|------------------------------------------------------------------------------------------------------------------------------------------------------------------------------------------------------------------------------------------------------------------------------------------------------------------------------------------------------------------------------------------------------------------------------------------------------------------------------------------------------------------------------------|
| Journal:                        | <i>BMJ Open</i>                                                                                                                                                                                                                                                                                                                                                                                                                                                                                                                    |
| Manuscript ID                   | bmjopen-2020-047100.R1                                                                                                                                                                                                                                                                                                                                                                                                                                                                                                             |
| Article Type:                   | Protocol                                                                                                                                                                                                                                                                                                                                                                                                                                                                                                                           |
| Date Submitted by the Author:   | 19-Apr-2021                                                                                                                                                                                                                                                                                                                                                                                                                                                                                                                        |
| Complete List of Authors:       | Robba, Chiara; Ospedale Policlinico San Martino, Neurocritical Care Unit Citerio, Giuseppe; University of Milan-Bicocca, School of Medicine; ASST di Monza, Emergency and Urgency<br>Taccone, Fabio; Erasmus Hospital<br>Galimberti, Stefania; Università degli Studi di Milano-Bicocca, School of Medicine<br>Rebora, Paola; University of Milan-Bicocca<br>Vargiolu, Alessia; University of Milan-Bicocca<br>Pelosi, Paolo; Ospedale Policlinico San Martino Istituto di Ricovero e Cura a Carattere Scientifico per l'Oncologia |
| <b>Primary Subject Heading</b>: | Intensive care                                                                                                                                                                                                                                                                                                                                                                                                                                                                                                                     |
| Secondary Subject Heading:      | Intensive care                                                                                                                                                                                                                                                                                                                                                                                                                                                                                                                     |
| Keywords:                       | Adult intensive & critical care < ANAESTHETICS, Neurological injury < NEUROLOGY, Neurophysiology < NEUROLOGY                                                                                                                                                                                                                                                                                                                                                                                                                       |
|                                 |                                                                                                                                                                                                                                                                                                                                                                                                                                                                                                                                    |

SCHOLARONE™  
Manuscripts





I, the Submitting Author has the right to grant and does grant on behalf of all authors of the Work (as defined in the below author licence), an exclusive licence and/or a non-exclusive licence for contributions from authors who are: i) UK Crown employees; ii) where BMJ has agreed a CC-BY licence shall apply, and/or iii) in accordance with the terms applicable for US Federal Government officers or employees acting as part of their official duties; on a worldwide, perpetual, irrevocable, royalty-free basis to BMJ Publishing Group Ltd ("BMJ") its licensees and where the relevant Journal is co-owned by BMJ to the co-owners of the Journal, to publish the Work in this journal and any other BMJ products and to exploit all rights, as set out in our [licence](#).

The Submitting Author accepts and understands that any supply made under these terms is made by BMJ to the Submitting Author unless you are acting as an employee on behalf of your employer or a postgraduate student of an affiliated institution which is paying any applicable article publishing charge ("APC") for Open Access articles. Where the Submitting Author wishes to make the Work available on an Open Access basis (and intends to pay the relevant APC), the terms of reuse of such Open Access shall be governed by a Creative Commons licence – details of these licences and which [Creative Commons](#) licence will apply to this Work are set out in our licence referred to above.

Other than as permitted in any relevant BMJ Author's Self Archiving Policies, I confirm this Work has not been accepted for publication elsewhere, is not being considered for publication elsewhere and does not duplicate material already published. I confirm all authors consent to publication of this Work and authorise the granting of this licence.

1  
2  
3 Multicenter observational study on practice of ventilation in brain injured patients:  
4 the VENTIBRAIN study protocol  
5  
6  
7  
8  
9

10 Chiara Robba<sup>1,5a</sup>, Giuseppe Citerio<sup>2a</sup>, Fabio Silvio Taccone<sup>3</sup>, Stefania Galimberti<sup>4</sup>,  
11 Paola Rebori<sup>4</sup>, Alessia Vargiolu<sup>2</sup>, Paolo Pelosi<sup>1,5</sup>, VENTIBRAIN Steering committee\*  
12  
13  
14

15  
16 <sup>1</sup>San Martino Policlinico Hospital, IRCCS for Oncology and Neuroscience, Genoa, Italy  
17

18  
19 <sup>2</sup>School of Medicine and Surgery, University of Milano Bicocca, Milan, Italy. OrciD  
20 0000-0002-5374-3161  
21  
22

23  
24 <sup>3</sup>Department of Intensive Care Medicine, Erasme Hospital, Université Libre de  
25 Bruxelles, Brussels, Belgium  
26  
27

28  
29 <sup>4</sup>Bicocca Bioinformatics Biostatistics and Bioimaging B4 Center, School of Medicine  
30 and Surgery, University of Milano - Bicocca, Monza, Italy  
31  
32

33  
34 <sup>5</sup>Department of Surgical Sciences and Integrated Diagnostics, University of Genoa,  
35 Genoa, Italy  
36  
37

38  
39  
40 <sup>a</sup>The authors have equally contributed  
41  
42

43  
44  
45  
46 Corresponding author:

47 Chiara Robba, PhD

48 [kiarobba@gmail.com](mailto:kiarobba@gmail.com)

49 Policlinico San Martino, Genova, Italy  
50  
51  
52  
53  
54  
55  
56  
57  
58  
59  
60

1  
2  
3  
4  
5  
6  
7  
8  
9  
10  
11  
12 \*VENTIBRAIN Enlarged Steering committee

13 Maura Mandelli, San Martino Policlinico Hospital, IRCCS for Oncology and  
14 Neuroscience, Genoa, Italy

15  
16 Jordi Mancebo, Servei de Medicina Intensiva, Hospital de Sant Pau, Barcelona, Spain

17 Robert Stevens, Departments of Anesthesiology and Critical Care Medicine,  
18 Neurology, and Neurosurgery, Johns Hopkins University School of Medicine,  
19 Baltimore, MD

20  
21 Geert Meyfroidt, Department and Laboratory of Intensive Care Medicine, University  
22 Hospitals Leuven and KU Leuven, Herestraat 49, Box 7003 63, 3000 Leuven, Belgium

23 Rafael Badenes Department of Anesthesiology and Surgical-Trauma Intensive Care,  
24 Hospital Clinic Universitari de Valencia, Department of Surgery, University of  
25 Valencia, Valencia, Spain

26  
27 Valentina Della Torre, Intensive Care Unit, St Mary's Hospital, London, UK

28 Raimund Helbok Department of Neurology, Neurological Intensive Care Unit,  
29 Medical University of Innsbruck, Anichstrasse 35, 6020, Innsbruck, Austria.

30 Jose' Suarez Department of Anesthesiology and Critical Care Medicine, Neurology,  
31 and Neurosurgery, Johns Hopkins University School of Medicine, Baltimore, MD

32 Nino Stocchetti Department of Physiopathology and Transplantation, Milan  
33 University, Milan, Italy; Neuro Intensive Care Unit, Fondazione Erasmus Medical  
34 Center, Ca Granda Ospedale Maggiore Policlinico Milano, Milan, Italy

35 Marcelo Gama De Abreu Department of Anaesthesiology and Intensive Care  
36 Medicine, Pulmonary Engineering Group, University Hospital Carl Gustav Carus at  
37 the Technische Universität Dresden, Fetscherstr. 74, 01307, Dresden, Germany.

38 Marcus Schultz Department of Intensive Care Medicine and Laboratory of  
39 Experimental Intensive Care and Anesthesiology, Academic Medical Center,  
40 University of Amsterdam, Amsterdam, The Netherlands.

41  
42 Raphael Cinotti Department of Anaesthesia and Critical Care, Hôpital Guillaume et  
43 René Laennec, University Hospital of Nantes, Saint-Herblain, France

44 Louis Blanch Critical Care Center, Institut d'Investigació i Innovació Parc Taulí I3PT,  
45 Hospital Universitari Parc Taulí, Sabadell, Spain. lblanch@tauli.cat.

46  
47 Centro de Investigación Biomédica en Red Enfermedades Respiratorias (CIBERES),  
48 Instituto de Salud Carlos III, Madrid, Spain.

49 Karim Asehnoune Department of Anaesthesia and Critical Care, Hôtel Dieu,  
50 University Hospital of Nantes, Nantes, France

51  
52 Christian Putensen Department of Anaesthesiology and Intensive Care Medicine,  
53 University Clinical Center Bonn, Bonn, North Rhine-Westphalia, Germany

54 John Laffey School of Medicine, National University of Ireland Galway (NUIG),  
55 Galway, Ireland  
56  
57  
58  
59  
60

## ABSTRACT

### Introduction

Mechanical ventilatory is a crucial element of acute brain injured patients' management. The ventilatory goals to ensure lung protection during acute respiratory failure may not be adequate in case of concomitant brain injury. Therefore, there are limited data from which physicians can draw conclusions regarding optimal ventilator management in this setting.

### Methods and analysis

This is an international multicenter prospective observational cohort study. The aim of the "Multicenter observational study on practice of ventilation in brain injured patients"-the VENTIBRAIN study- is to describe the current practice of ventilator settings and mechanical ventilation in acute brain injured patients.

Secondary objectives include the description of ventilator settings among different countries, and their association with outcomes.

Inclusion criteria will be adult patients admitted to the intensive care unit (ICU) with a diagnosis of traumatic brain injury or cerebrovascular diseases (intracranial hemorrhage, subarachnoid hemorrhage, ischemic stroke), requiring intubation and mechanical ventilation and admission to the ICU. Exclusion criteria will be the following: patients aged < 18 years; pregnant patients; patients not intubated or not mechanically ventilated or receiving only non-invasive ventilation. Data related to clinical examination, neuromonitoring if available, ventilator settings and arterial blood gases will be recorded at admission and daily for the first 7 days and then at day 10 and 14. The Glasgow Outcome Scale Extended on mortality and neurological outcome (GOSE) will be collected at discharge from ICU, hospital and at 6 months follow-up.

### Ethics and dissemination

The study has been approved by the Ethic committee of Brianza at the Azienda Socio Sanitaria Territoriale (ASST)-Monza. Data will be disseminated to the scientific community by abstracts submitted to the European Society of Intensive Care Medicine annual conference and by original articles submitted to peer-reviewed journals.

1  
2  
3  
4  
5 **Trial registration number:** NCT04459884  
6  
7  
8  
9

10 **Keywords:** mechanical ventilation; brain injury; ventilator settings; outcome;  
11  
12 Glasgow coma scale  
13  
14  
15  
16

17 **Strengths and limitations of the study**

- 18  
19 - Results from this large multicenter study including mechanically ventilated  
20 acute brain injury patients admitted to the intensive care unit will provide a  
21 detailed description of the patients' characteristics, ventilator strategies, and  
22 their association to clinical outcomes.  
23  
24 - The main strength of this study relies on the global approach, since it allows  
25 to explore clinical practice in a wide number of geographical regions with  
26 different public health issues, including low- and middle-income countries.  
27  
28 - The main limitation of this study relies on the observational design with  
29 consequent difficulty to draw causal inferences.  
30  
31 - The results from this study will generate hypotheses for respiratory  
32 management of acute brain injured patients and help in better study design  
33 plans for future randomized controlled trials.  
34  
35  
36  
37  
38  
39  
40  
41  
42  
43  
44  
45  
46  
47  
48  
49  
50  
51  
52  
53  
54  
55  
56  
57  
58  
59  
60

**List of abbreviations and relevant definitions**

ABI Acute Brain Injury

ARDS Acute Respiratory Distress Syndrome

CA Competent Authority

COPD Chronic Obstructive Pulmonary Disease

CPP Cerebral Perfusion Pressure

CRF Case Report Form

CT Computerized Tomography

DSMB Data safety Managing Board

ESICM European Society of Intensive Care Medicine

GCP General Clinical Practice

GCS Glasgow Coma Scale

GOSE Glasgow Extended Outcome Scale

ICP Intra Cranial Pressure

ICU Intensive Care Unit

ICH Intra Cerebral Hemorrhage

MAP Mean Arterial Pressure

MV Mechanical Ventilation

NC National Coordinator

PaO<sub>2</sub> Arterial Partial Pressure of Carbon DioxidePaO<sub>2</sub> Arterial Partial Pressure of OxygenPbO<sub>2</sub> Brain Tissue Oxygen Tension

PBW Predicted body weight

PEEP Positive End–expiratory Pressure

PI Principal Investigator

RM Recruitment Maneuvers

SAH – Subarachnoid Hemorrhage

SC Steering Committee

TCD Trans Cranial Doppler

TV Tidal Volume

VALI Ventilator–associated Lung Injury

WBP Personal Data Protection Act

WMO Medical Research Involving Human Subjects Act

## BACKGROUND AND RATIONALE

Mechanical ventilation (MV) is a frequently applied and often a life-saving strategy in severely brain injured patients.<sup>1</sup> Paradoxically, ventilation itself has the potential to cause further pulmonary and cerebral damage and can increase mortality and morbidity.<sup>2</sup> Several experimental and clinical studies have shown how brain injury can cause secondary lung injury.<sup>2-4</sup> Lung injury could be due either to mechanical ventilation, which is often necessary in brain injured patients, or to inflammatory response that follows primary acute brain injury, or a combination of both mechanisms.<sup>5</sup>

The so-called '*protective lung ventilation*' strategies include the use of low tidal volume (TV), positive end expiratory pressure (PEEP), and eventually recruitment maneuvers (RMs), and are aimed to prevent lung damage and to reduce morbidity and mortality in patients with acute respiratory distress syndrome (ARDS).<sup>6,7</sup> In particular, the use of low tidal volume seems to have the greater importance,<sup>8-11</sup> and it is recommended in critically ill patients with ARDS.<sup>12</sup>

Results from one multicenter randomized controlled trial suggest that intensive care unit (ICU) patients without ARDS could also benefit from '*protective lung ventilation strategies*'.<sup>13</sup> A recent meta-analysis showed a higher incidence of pulmonary complications and even increased mortality in patients who received '*conventional ventilation*' with traditionally sized or higher tidal volumes compared to patients undergoing protective strategies.<sup>14</sup>

Therefore, the concept of '*protective lung ventilation*' has led to a clinical approach, which seems to reduce morbidity and mortality of ICU patients with ARDS but can also have a beneficial effect on patients with healthy lungs and in the perioperative settings. However, these recommendations often come into conflict with the management of patients affected by acute brain injury, because low tidal volumes, high PEEP and RMs can increase carbon dioxide levels (CO<sub>2</sub>) and increase intrathoracic pressure, thus having detrimental effects on intracranial pressure (ICP) and cerebral perfusion pressure (CPP).<sup>15-17</sup> Because of this, brain injured patients have been traditionally excluded from the major trials regarding mechanical ventilation. There is therefore still uncertainty regarding the use of protective ventilation in brain injured ill patients and, as pointed out by a recent consensus of

1  
2  
3 experts,<sup>18</sup> a multicenter international study on mechanical ventilation strategies in  
4 brain injured patients is currently needed.  
5  
6  
7

## 8 **METHODS**

### 9 **Study design**

10 We designed a large international multicenter prospective observational cohort  
11 study including mechanically ventilated brain injured patients and planned 6-month  
12 follow-up.  
13  
14  
15  
16  
17

### 18 **Objectives**

19 Primary objective is to describe ventilation settings of intubated and mechanically  
20 ventilated neurocritically ill patients admitted to the ICU.  
21  
22

23 Secondary objectives are:  
24

- 25 - To describe the differences in ventilator settings among different countries.
- 26 - To evaluate the association of ventilator settings with pulmonary complications  
27 (including pneumonia, acute distress respiratory failure, neurogenic pulmonary  
28 edema).
- 29 -To describe differences in the ventilator settings in presence/absence of high  
30 intracranial pressure.
- 31 - To evaluate the association of ventilator settings with outcomes (i.e. 6-months  
32 mortality and neurological outcome, in-hospital and ICU mortality, hospital length of  
33 stay, duration of mechanical ventilation, ventilator free days at ICU discharge).  
34  
35  
36  
37  
38  
39  
40  
41  
42  
43  
44  
45  
46

### 47 **Study population**

48 We will collect data of consecutive patients with acute brain injury requiring  
49 endotracheal intubation and mechanical ventilation, who are admitted to the  
50 intensive care unit (ICU).  
51  
52  
53  
54  
55

### 56 **Inclusion criteria will be:**



- Age  $\geq$  18 years.
- Patients admitted to the ICU with a diagnosis of a primary non-anoxic brain injury, such as:
  - Traumatic brain injury (TBI)
  - Cerebrovascular diseases (intracranial hemorrhage, ICH; subarachnoid hemorrhage, SAH; acute ischemic stroke, AIS)
- Patients requiring intubation, mechanical ventilation, or needing mechanical ventilation during ICU stay.

### Exclusion criteria

- Age < 18 years.
- Pregnant patients.
- Patients not intubated or not mechanically ventilated or receiving only non-invasive ventilation (i.e., patient never received invasive ventilation during the present admission).

### Outcomes

Enrolled patients will be followed until ICU-hospital discharge or death, whatever comes first and at 6 months follow up.

Outcomes will be assessed as:

- 6-months mortality and neurological outcome (as for extended Glasgow Outcome Scale, GOSE).
- Pulmonary complications (defined as: acute distress respiratory failure, pulmonary infection, pneumothorax, pleural effusion, atelectasis, non-cardiogenic pulmonary edema).
- In-hospital and ICU mortality.
- Hospital length of stay (LOS) in patients discharged alive.
- Duration of mechanical ventilation (in days), ventilator free days (days) at ICU discharge.

### Study procedures and settings

The protocol has been endorsed by the European Society of Intensive Care Medicine (ESICM). Worldwide, more than 200 centers from 56 countries have been contacted to participate in the VENTIBRAIN study (more information at <https://www.esicm.org/research/trials/endorsed-trials/ongoing-projects-endorsed/>).

The established recruitment window will open in spring-summer 2021. The inclusion period will be flexible for participating centers and determined at a later stage together with the study-coordinator. Centers will enroll consecutive patients for a minimum period of 3 months to a maximum period of 6 months.

Patients in participating centers will be screened on a daily basis. After 6 months from recruitment, the patients or their family members will be contacted by phone for the follow-up evaluation.

### Data collection

The following data will be collected at admission, and daily until day 7, and then at day 10 and 14 from start ventilation(Figure1):

- Demographic data and baseline clinical data, including neurological, neuroradiological and respiratory severity scores (Table 1-4), neuromonitoring data, and the occurrence of neurological and systemic complications.
- Ventilator settings, in particular: modality of ventilator, tidal volume, plateau pressure, peak pressure, mean airway pressure, positive end expiratory pressure, respiratory rate, inspired fraction of oxygen.
- Gas exchange variables and vital parameters.
- Chest radiography data from available chest X-rays and/or Computed Tomography (i.e., no extra chest X-rays are obtained).
- Therapy Intensity Levels (TILs) and predefined complications recorded from medical chart (Table 5).

At ICU and hospital discharge, data on mortality, length of stay (days) duration of mechanical ventilation (in days), ventilator free days (days) will be collected.

1  
2  
3 At 6-months, mortality and neurological outcome (as for extended Glasgow  
4 Outcome Scale, GOSE, Table 6) will be collected.  
5  
6  
7

8  
9 The GOSE at 6 months follow-up will be collected via phone-structured interviews to  
10 the patients and/or family members using a validated questionnaire.<sup>19</sup>Data on the  
11 cause and date of death will be also collected.  
12  
13  
14

## 15 16 **Data management**

17  
18  
19 Anonymized data will be collected in a web-based electronic Case-Report Form  
20 (eCRF) and protected by encryption software and password provided to single users.  
21 Each patient will be associated to a numeric code generated by the central database.  
22 Data will be checked for consistency and completeness by the study coordinator and  
23 the core Steering Committee, to ensure the high quality of the collected data before  
24 the analysis and to limit the rate of errors and missing data. Also, a strict monitoring  
25 of data quality during the study will be performed.  
26  
27  
28  
29  
30  
31  
32

33 The data will be securely stored at the University Milano-Bicocca; all procedures will  
34 comply with the EU Regulation 2016/679 on the protection of natural persons  
35 regarding personal data processing and movement. A Data Transfer Agreement to  
36 confirm the terms for data transfer from the centers to the Sponsor will be finalized.  
37 Patients' demographic characteristics, co-morbidities, diagnosis, timing of acute  
38 events and clinical presentation of acute brain injury will be extracted from the  
39 patients' medical records.  
40  
41  
42  
43  
44  
45  
46  
47

## 48 **STATISTICAL ANALYSIS**

### 49 **Sample size calculation**

50  
51 Since the hypotheses of the study are exploratory, no formal sample size calculation  
52 has been performed. This international prospective observational study aims to  
53 recruit more than 3000 patients after acute brain damage. Recruitment will last 3-6  
54 months at each center, aiming to enroll an average of 30 consecutive  
55 patients/center. This timeframe has been set according to a previous study<sup>20</sup> similar  
56  
57  
58  
59  
60

1  
2  
3 to VENTIBRAIN, and including a similar network of centers. The number of enrolled  
4 patients and ICUs is considered adequate to capture the range of variation in  
5 ventilator settings observed in the clinical practice. We aim to include also low-  
6 middle income countries, in order to have a representation of the variability  
7 worldwide.  
8  
9  
10  
11  
12

### 13 **Plan of analysis**

14 Patient and ventilation characteristics will be described by means (standard  
15 deviation), medians (I-III quartiles) and proportions, as appropriate. The different  
16 ventilator settings will be described according to type of brain injury (i.e. TBI, AIS and  
17 SAH), presence and severity of lung damage and countries. The association between  
18 daily ventilator settings and outcomes will be evaluated by appropriate multivariable  
19 models adjusting for relevant confounders at baseline (such as age, sex,  
20 cardiovascular and neurological history, primary diagnosis, GCS, pupillary reactivity  
21 and the severity of pulmonary and neurological conditions). We will explore the role  
22 of currently known threshold for other ICU populations of ventilator settings;  
23 however, as in this population no specific thresholds have been defined, we will aim  
24 to assess the distribution of these settings and eventually define new thresholds for  
25 the brain injured population.  
26  
27  
28  
29  
30  
31  
32  
33  
34  
35  
36  
37

38 Cause specific Cox model will be applied to time to event outcomes (i.e., mortality,  
39 pulmonary complications) and logistic regression to dichotomous outcomes (i.e.  
40 poor neurological outcome at 6 month, GOSE <5). Multilevel regression models will  
41 be applied to account for repeated measurements on patients and heterogeneity  
42 induced by centers and, if residual variation will be present, by countries  
43  
44  
45  
46

47 The cumulative incidence in time of pulmonary complications during hospital stay  
48 will be estimated along with 95% confidence intervals accounting for mortality and  
49 discharge as competing events by the Aalen-Johansen estimator.  
50  
51

52 The occurrence of raised intracranial pressure value lasting more than 5 minutes >20  
53 mmHg will be described daily together with the earlier ventilator settings. A  
54 multilevel longitudinal model on daily raised intracranial pressure will be also applied  
55 to evaluate the possible impact of ventilator settings adjusting for relevant  
56 confounders (as defined before); this model will include only ICP monitored patients.  
57  
58  
59  
60

1  
2  
3 A sensitivity analysis excluding data from centers that recruited less than 20 patients  
4 will be performed. Multiple imputation on covariates will be performed if missing  
5 will exceed 10%. Statistical analyses will be conducted using R and SAS.  
6  
7  
8  
9

### 10 **Patient and Public Involvement**

11 No patient involved.  
12  
13

## 14 **ETHICAL CONSIDERATIONS**

### 15 **Ethical standards**

16 The PI and Steering Committee will ensure that this study is conducted in full  
17 conformity with the Declaration of Helsinki and Good Clinical Practices.  
18  
19

### 20 **Ethics committee**

21 Each NC/PI will notify the relevant ethics committee, in compliance with the local  
22 legislation and rules. The national coordinators will facilitate this process. The  
23 approval of the protocol (if required by local authorities) must be obtained before  
24 any participant is enrolled. Any amendment to the protocol will require review and  
25 approval by the SC before the changes are implemented to the study.  
26  
27  
28  
29  
30  
31  
32  
33

### 34 **Lack of capacity and Delayed Consent**

35 Informed consent will be obtained from patients with no lack of capacity. For  
36 patients not able to provide informed consent at the time of recruitment, the  
37 responsible clinical/research staff will act as Consulter and consent eligible patients  
38 after discussion with the next of kin. If the patient has a Power of Attorney or a Legal  
39 tutor or an, he/she will act as Consultee and will be asked to consent/decline  
40 participation to the study on legal behalf of the patient.  
41  
42  
43  
44  
45  
46  
47

48 In presence of patients' Advance Decision Plan, including participation in research  
49 studies, the Plan will be respected and recruitment pursued/abandoned accordingly.  
50

51 At follow-up, patients who have regained capacity will be asked to provide Informed  
52 Consent and will be given the possibility to:  
53

- 54 • Provide Informed Consent for the acute data and follow-up.
- 55 • Deny research participation and request destruction of acute data collected.
- 56  
57  
58  
59  
60

## Dissemination

Data will be disseminated to the scientific community by abstracts submitted to the European Society of Intensive Care Medicine annual conference and by original articles submitted to peer-reviewed journals.

## Publication and data sharing policy

### Data sharing policy

After the publication of the main papers, any requests for the use of the data will be made to the VENTIBRAIN Core Steering Committee (CR, GC, PP, FST), and decisions will be made in relation to these requests. The VENTIBRAIN investigators will have priority in requests to use the data set for subsequent studies.

### Publication and Authorship

Data will be made available to the scientific community by means of abstract by scientific papers submitted to peer-reviewed journals. Authorship of the main manuscript will follow the ICMJE recommendations that base authorship on the following 4 criteria:

- Substantial contributions to the conception or design of the work; or the acquisition, analysis, or interpretation of data for the work; AND
- Drafting the work or revising it critically for important intellectual content; AND
- Final approval of the version to be published; AND
- Agreement to be accountable for all aspects of the work in ensuring that questions related to the accuracy or integrity of any part of the work are appropriately investigated and resolved.

A writing committee composed by the members of the core steering committee and biostatisticians and a part of the enlarged steering committee will draft the manuscript and will be author of the manuscript. National coordinators will be authors if they will fulfill the ICMJE criteria and if they will promote the enrolment of at least 300 patients in their country. All the participant centers will be granted in the group authorship, "VENTIBRAIN". The corresponding author will specify the group name and will clearly identify the group members who can take credit and responsibility for the work as collaborators. For each center, a participant will be

1  
2  
3 indicated in the group authorship list every 10 patients enrolled. The ESICM support  
4 will be acknowledged in each publication generated from the study. In the main  
5 manuscripts, CR and GC will share the first authorship, FST will be the third author,  
6 and PP will be the last author. After publication of the primary results, on request  
7 the pooled dataset will be available for all members of the VENTIBRAIN collaborators  
8 for preplanned substudies and secondary analysis, after judgement and approval of  
9 scientific quality and validity statement guidelines and checklists. Each secondary  
10 analysis or substudy approved will have to include the core Steering Committee as  
11 authors. Preplanned analyses include the evaluation of blood gas values (such as  
12 oxygen and carbon dioxide) and their association with patient's outcome, and the  
13 assessment of mechanical power used in this cohort of patients and its effect on  
14 outcomes.

## 25 26 27 **DISCUSSION AND EXPECTED IMPACT OF THE STUDY**

28 VENTIBRAIN is designed to obtain a detailed description of patient's characteristics,  
29 management strategies resource use and association with clinical outcomes across  
30 many centers/countries. In particular, the study will provide insights in relation to  
31 clinical management, monitoring and treatment, practice variation in neuro-  
32 intensive care units around the world, differences in the ventilator management of  
33 brain injured patients and their potential association with outcome.

34 VENTIBRAIN has several strengths. First, its prospective design will increase the  
35 accuracy of data collection with potential minimization of the chance of residual  
36 confounding by unmeasured variables, which is a common limitation of  
37 retrospective design. Second, we aim to obtain a large sample size, able to provide  
38 information on neurological and systemic complications in mechanically ventilated  
39 brain injured patients, and eventually evaluate potential associations between  
40 ventilator settings and ICU/ 6 months patients' outcomes. Third, the inclusion of a  
41 large number of patients from different centers (dedicated and not dedicated  
42 neuroICUs), and countries, including low-income countries will provide information  
43 on geoeconomics differences in epidemiology, management strategies and  
44 outcomes of mechanically ventilated brain injured patients.

1  
2  
3 The need to particularly focus on the mechanical ventilator settings in this group of  
4 patients is related to the specific ventilator needs of brain injured patients.<sup>18,21</sup> Brain  
5 injured patients have a high number of pulmonary complications, ventilator  
6 associated pneumonia, and a high rate of need of tracheostomy and extubation  
7 failure.<sup>22</sup>

8  
9  
10  
11  
12 The optimal oxygenation and carbon dioxide targets are not clear in this population.  
13 Hypoxia has been largely recognized as a major cause of secondary brain injury;  
14 recently, also hyperoxia has shown to have potential detrimental effects on patients'  
15 outcome.<sup>23,24</sup>

16  
17  
18  
19  
20 Similarly, hypercapnia can cause cerebral vasodilation and increase intracranial  
21 pressure and should therefore be avoided, but hypocapnia and cerebral  
22 vasoconstriction can lead to cerebral ischemia and currently it is suggested only in  
23 case of life-threatening intracranial hypertension and risk of brain herniation.<sup>25,26</sup>

24  
25  
26 All in it, ventilator targets are unclear in this group of patients.

27  
28  
29 Moreover, the general principles and ventilator settings applied in the general  
30 population have not been established in brain injured patients.<sup>19</sup>

31  
32  
33 Recent literature has highlighted the importance of protective ventilation in ARDS  
34 and non-ARDS patients,<sup>27-32</sup> as well as weaning protocols. However, country-specific  
35 practices, the lack of clear guidelines in the neuroICU population or different  
36 resources among countries may affect the implementation of all these interventions.

37  
38  
39  
40  
41  
42 Protective ventilator strategies such as high positive end expiratory pressure or  
43 recruitment maneuvers may increase intrathoracic pressure and consequently  
44 reduce jugular outflow;<sup>33</sup> low tidal volume and permissive hypercapnia may be  
45 detrimental in this group of patients, and rescue therapies used in ARDS patients  
46 such as prone position can be contraindicated for the risk of increased ICP and  
47 neuromonitoring tools displacement. Finally, extracorporeal membrane oxygenation  
48 (ECMO) can be contraindicated for the risk of haemorrhage.<sup>34</sup> However, although  
49 these patients have been traditionally ventilated with high tidal volumes and low  
50 positive end expiratory pressure,<sup>29</sup> recent evidence suggests that the concept of  
51 protective ventilation is gaining interest even in the brain injured population.<sup>19</sup>



1  
2  
3 Results from the VENTIBRAIN study will allow to clarify the current status of the  
4 ventilator management of these patients, and in particular to discriminate the  
5 effects of tidal volume, positive end expiratory pressure and driving pressure on  
6 outcomes in brain injured patients with, at risk of, or without acute distress  
7 respiratory pressure (using predefined scores), and the use of specific settings in  
8 case of intracranial hypertension. The VENTIBRAIN study offers a unique opportunity  
9 to globally uniform clinical guidelines regarding ventilator strategies in brain injured  
10 patients and eventually improving their outcome.  
11  
12  
13  
14  
15  
16  
17  
18

19 The VENTIBRAIN study has also several limitations that need to be addressed. First,  
20 we cannot exclude that ventilator settings and targets used by clinicians might be  
21 biased by the participation in the study, thus reducing the ability of VENTIBRAIN to  
22 represent the real ICU care of these patients. Second, the CRF designed for  
23 VENTIBRAIN was aimed to not cause excessive workload for the participating  
24 centres. Therefore, some data regarding systemic complications will be potentially  
25 missing, while continuous data on respiratory and neuromonitoring might be  
26 incomplete. Similarly, due to the limited number of daily arterial blood gases and  
27 ventilator settings data collection, we will have a limited view that might not reflect  
28 completely real clinical practice.  
29  
30  
31  
32  
33  
34  
35  
36  
37

38 Finally, the observational nature of VENTIBRAIN makes impossible to draw causal  
39 inferences between ventilator management and outcome in this group of patients.  
40 However, VENTIBRAIN is aimed to generate hypotheses for treatment effects and  
41 pave the way to design future randomized controlled trials of ventilation in these  
42 settings to draw causal inferences and improve clinical outcomes in ventilated brain  
43 injured patients.  
44  
45  
46  
47  
48

49 VENTIBRAIN is designed to assess and describe the clinical practice in ventilator  
50 strategies in critically ill brain injured patients in a large number of different  
51 countries/centers worldwide. Results from this study will help to identify differences  
52 in clinical practices and could be used to plan new trials on mechanical ventilation in  
53 this specific subgroup of patients.  
54  
55  
56  
57  
58  
59  
60

1  
2  
3  
4  
5  
6  
7 **Contributors:** CR, GC, FST, PP were equally responsible for writing of  
8 the manuscript and participated in study design. CR drafted the first version of the  
9 manuscript. FST, PP, GC, SG, PR, AV reviewed the manuscript and agreed with  
10 submission.  
11  
12  
13

14 **Funding:** This research received no specific grant from any funding agency in the  
15 public, commercial or not-for profit sectors.  
16  
17

18 **Competing interests:** None declared.  
19

20 Patient consent: Not required.  
21  
22  
23  
24  
25  
26  
27  
28  
29  
30  
31  
32  
33  
34  
35  
36  
37  
38  
39  
40  
41  
42  
43  
44  
45  
46  
47  
48  
49  
50  
51  
52  
53  
54  
55  
56  
57  
58  
59  
60

## References

1. Borsellino B, Schultz MJ, Gama de Abreu M et al. Mechanical ventilation in neurocritical care patients: a systematic literature review. *Expert Rev Respir Med* 2016 Oct;10(10):1123-32
2. Slutsky AS. Lung injury caused by mechanical ventilation. *Chest* 1999;116:9S-15S
3. Robba C, Bonatti G, Battaglini D et al. Mechanical ventilation in patients with acute ischaemic stroke: from pathophysiology to clinical practice. *Care* 2019 Dec 2;23(1):388
4. Samary CS, Ramos AB, Maia LA et al. Focal ischemic stroke leads to lung injury and reduces alveolar macrophage phagocytic capability in rats. *Crit Care* 2018 Oct 5;22(1):249
5. Heuer JF, Pelosi P, Hermann P et al. Acute effects of intracranial hypertension and ARDS on pulmonary and neuronal damage: a randomized experimental study in pigs. *Intensive Care Med*. 2011 Jul;37(7):1182-91
6. Putensen C, Theuerkauf N, Zinserling J et al. Meta-analysis: ventilation strategies and outcomes of the acute respiratory distress syndrome and acute lung injury. *Ann Intern Med* 2009;151:566-576
7. Saddy F, Sutherasan Y, Rocco PR et al. Ventilator-associated lung injury during assisted mechanical ventilation. *Semin Respir Crit Care Med* 2014 Aug;35(4):409-17
8. Esteban A, Ferguson ND, Meade MO, et al. Evolution of mechanical ventilation in response to clinical research. *Am J Respir Crit Care Med* 2008;177:170-177
9. Matthay MA, Ware LB, Zimmerman GA. The acute respiratory distress syndrome. *J Clin Invest* 2012;122:2731-2740
10. Needham DM, Colantuoni E, Mendez-Tellez PA et al. Lung protective mechanical ventilation and two year survival in patients with acute lung injury: prospective cohort study. *BMJ* 2012;344:e2124
11. Sage M, See W, Nault S et al. Effect of Low Versus High Tidal-Volume Total Liquid Ventilation on Pulmonary Inflammation. *Front Physiol*. 2020 Jun 18;11:603
12. Dellinger RP, Levy MM, Rhodes A, et al. Surviving sepsis campaign: international guidelines for management of severe sepsis and septic shock: 2012. *Crit Care Med* 2013;41:580-637.

- 1  
2  
3  
4  
5  
6  
7  
8  
9  
10  
11  
12  
13  
14  
15  
16  
17  
18  
19  
20  
21  
22  
23  
24  
25  
26  
27  
28  
29  
30  
31  
32  
33  
34  
35  
36  
37  
38  
39  
40  
41  
42  
43  
44  
45  
46  
47  
48  
49  
50  
51  
52  
53  
54  
55  
56  
57  
58  
59  
60
13. Determann RM, Royakkers A, Wolthuis EK et al. Ventilation with lower tidal volumes as compared with conventional tidal volumes for patients without acute lung injury: a preventive randomized controlled trial. *Crit Care* 2010;14:R1
14. Serpa Neto A, Cardoso SO, Manetta JA et al. Association between use of lung-protective ventilation with lower tidal volumes and clinical outcomes among patients without acute respiratory distress syndrome: a meta-analysis. *JAMA* 2012;308:1651-1659
15. Stevens RD, Lazaridis C, Chalela JA. The role of mechanical ventilation in acute brain injury. *Neurologic clinics*. 2008; 26: 543-563
16. Cinotti R, Bouras M, Roquilly A, Asehnoune K Management and weaning from mechanical ventilation in neurologic patients. *Annals of translational medicine* 2019; 6: 381
17. Della Torre V, Badenes R, Corradi F et al. Acute respiratory distress syndrome in traumatic brain injury: how do we manage it? *J Thorac Dis.* 2017 Dec;9(12):5368-5381
18. Robba C, Poole D, McNett M et al. Recommendations on Mechanical Ventilation in Acute Brain Injured Patients: Results of a European Society of Intensive Care Medicine and Neurocritical Care Society Consensus. *Intensive Care Med* 2020, Dec;46(12):2397-2410
19. Wilson JT, Pettigrew LE, Teasdale GM. Structured interviews for the Glasgow Outcome Scale and the extended Glasgow Outcome Scale: guidelines for their use. *J Neurotrauma* 1998;15:573-85
20. Citerio G, Prisco L, Oddo M et al. International prospective observational study on intracranial pressure in intensive care (ICU): the SYNAPSE-ICU study protocol. *BMJ Open* 2019 Apr 20;9(4):e026552.
21. Frisvold SK, Robba C, Guérin C. What respiratory targets should be recommended in patients with brain injury and respiratory failure? *Intensive Care Med.* 2019
22. Pelosi P, Ferguson ND, Frutos-Vivar F, et al. Management and outcome of mechanically ventilated neurologic patients. *Crit Care Med* 2011; 39: 1482-92
23. Koutsoukou A, Perraki H, Raftopoulou A, et al. Respiratory mechanics in brain-damaged patients. *Intensive Care Med* 2006; 32: 1947-1954
24. Nortje J, Coles JP, Timofeev I et al. Effect of hyperoxia on regional oxygenation and metabolism after severe traumatic brain injury: preliminary findings. *Crit Care Med* 2008; 36: 273-281

- 1  
2  
3 25. Hawryluk GW, Aguilera S, Buki A, et al. A management algorithm for patients  
4 with intracranial pressure monitoring: the Seattle International Severe Traumatic  
5 Brain Injury Consensus Conference (SIBICC). *Intensive Care Med* 2019;45(12):1783-  
6 1794  
7  
8  
9 26. Carney N, Totten AM, O'Reilly C, et al. Guidelines for the Management of Severe  
10 Traumatic Brain Injury, Fourth Edition. *Neurosurgery*. 2017, 1;80(1):6-15  
11  
12  
13 27. Karalapillai D, Weinberg L, Peyton P, et al. Effect of Intraoperative Low Tidal  
14 Volume vs Conventional Tidal Volume on Postoperative Pulmonary Complications in  
15 Patients Undergoing Major Surgery: A Randomized Clinical Trial.  
16 *JAMA*. 2020 Sep 1;324(9):848-858.  
17  
18  
19 28. Serpa Neto A, Simonis FD, Barbas CS, et al. Association between tidal volume  
20 size, duration of ventilation, and sedation needs in patients without acute  
21 respiratory distress syndrome: an individual patient data meta-analysis.  
22 *Intensive Care Med*. 2014 Jul;40(7):950-7  
23  
24  
25 29. Caricato A, Conti G, Della Corte F, et al. Effects of PEEP on the intracranial system  
26 of patients with head injury and subarachnoid hemorrhage: the role of respiratory  
27 system compliance. *J Trauma* 2005; 58: 571-576  
28  
29  
30 30. Robba C, Ortu A, Bilotta F et al. Extracorporeal membrane oxygenation for adult  
31 respiratory distress syndrome in trauma patients: A case series and systematic  
32 literature review. *J Trauma Acute Care Surg*. 2017 Jan;82(1):165-173  
33  
34  
35 31. Tejerina E, Pelosi P, Muriel A, et al. for VENTILA group. Association between  
36 ventilatory settings and development of acute respiratory distress syndrome in  
37 mechanically ventilated patients due to brain injury. *J Crit Care*. 2017  
38  
39  
40 32. Neto AS, Barbas CSV, Simonis FD et al. PROVENT; PROVE Network investigators.  
41 Epidemiological characteristics, practice of ventilation, and clinical outcome in  
42 patients at risk of acute respiratory distress syndrome in intensive care units from 16  
43 countries (PROVENT): an international, multicentre, prospective study. *Lancet Respir*  
44 *Med*. 2016 Nov;4(11):882-893  
45  
46  
47 33. Simonis FD, Serpa Neto A, Binnekade JM et al. Writing Group for the PReVENT  
48 Investigators, Effect of a Low vs Intermediate Tidal Volume Strategy on Ventilator-  
49 Free Days in Intensive Care Unit Patients Without ARDS: A Randomized Clinical Trial.  
50 *JAMA*. 2018 Nov 13;320(18):1872-1880.  
51  
52  
53 34. Serpa Neto A, Hemmes SN, Barbas CS, et al. PROVE Network  
54 Investigators. Protective versus Conventional Ventilation for Surgery: A Systematic  
55 Review and Individual Patient Data Meta-analysis. *Anesthesiology*. 2015  
56 Jul;123(1):66-78  
57  
58  
59  
60

### Figures headings:

Figure 1. Timetable of the study. Abbreviations: ABGs, arterial blood gases; ICU, intensive care unit; GOSE, Glasgow outcome scale extended.

### Tables

Table 1. The Berlin Definition of ARDS. Abbreviations: ARDS, acute respiratory distress syndrome; CPAP, continuous positive airway pressure; FiO<sub>2</sub>, fractional inspired oxygen; PaO<sub>2</sub>, arterial oxygen tension; PEEP, positive end-expiratory pressure.

| Criteria                     | Definition                                                                                                                                                                               |                                                                                            |                                                                                    |
|------------------------------|------------------------------------------------------------------------------------------------------------------------------------------------------------------------------------------|--------------------------------------------------------------------------------------------|------------------------------------------------------------------------------------|
| Cause                        | Respiratory failure not fully explained by cardiac failure or fluid overload; need objective assessment to exclude hydrostatic oedema if no risk factors present (eg, echocardiography). |                                                                                            |                                                                                    |
| Timing                       | Within 1 week of a known clinical insult or new/worsening respiratory symptoms.                                                                                                          |                                                                                            |                                                                                    |
| Chest imaging (Rx or CTscan) | Characteristics of the lung images                                                                                                                                                       |                                                                                            |                                                                                    |
| Oxygenation                  | Mild<br>200 < PaO <sub>2</sub> /FiO <sub>2</sub> ≤ 300<br>PEEP or CPAP ≥ 5 cm H <sub>2</sub> O                                                                                           | Moderate<br>100 < PaO <sub>2</sub> /FiO <sub>2</sub> ≤ 200<br>PEEP ≥ 5 cm H <sub>2</sub> O | Severe<br>PaO <sub>2</sub> /FiO <sub>2</sub> ≤ 100<br>PEEP ≥ 5 cm H <sub>2</sub> O |

Table 2. Glasgow Coma Scale

|        | 1                  | 2                                                   | 3                                                          | 4                                       | 5                            | 6              |
|--------|--------------------|-----------------------------------------------------|------------------------------------------------------------|-----------------------------------------|------------------------------|----------------|
| Eyes   | Does not open eyes | Opens eyes in response to pain                      | Opens eyes in response to voice                            | Opens eyes spontaneously                | N/A                          | N/A            |
| Verbal | Makes no sounds    | Makes sounds                                        | Words                                                      | Confused, disoriented                   | Oriented, converses normally | N/A            |
| Motor  | Makes no movements | Extension to painful stimuli (decerebrate response) | Abnormal flexion to painful stimuli (decorticate response) | Flexion / Withdrawal to painful stimuli | Localizes to painful stimuli | Obeys commands |

Table 3. Marshall classification of traumatic brain injury

|                                                    |                                                                                                                                                                                                                  |
|----------------------------------------------------|------------------------------------------------------------------------------------------------------------------------------------------------------------------------------------------------------------------|
| <b>Diffuse injury I<br/>(no visible pathology)</b> | <ul style="list-style-type: none"> <li>no visible intracranial pathology</li> </ul>                                                                                                                              |
| <b>Diffuse injury II<br/>(swelling)</b>            | <ul style="list-style-type: none"> <li>midline shift of 0 to 5 mm</li> <li>basal cisterns remain visible</li> <li>no high or mixed density lesions <math>&gt;25 \text{ cm}^3</math></li> </ul>                   |
| <b>Diffuse injury III</b>                          | <ul style="list-style-type: none"> <li>midline shift of 0 to 5 mm</li> <li>basal cisterns compressed or completely effaced</li> <li>no high or mixed density lesions <math>&gt;25 \text{ cm}^3</math></li> </ul> |
| <b>Diffuse injury IV<br/>(shift)</b>               | <ul style="list-style-type: none"> <li>midline shift <math>&gt;5 \text{ mm}</math></li> <li>no high or mixed density lesions <math>&gt;25 \text{ cm}^3</math></li> </ul>                                         |
| <b>Evacuated mass lesion V</b>                     | <ul style="list-style-type: none"> <li>any lesion evacuated surgically</li> </ul>                                                                                                                                |
| <b>Non-evacuated mass lesion VI</b>                | <ul style="list-style-type: none"> <li>high or mixed density lesions <math>&gt;25 \text{ cm}^3</math></li> <li>not surgically evacuated</li> </ul>                                                               |



Table 4. Fisher scale.

|                |                                                                                                                                                                                   |
|----------------|-----------------------------------------------------------------------------------------------------------------------------------------------------------------------------------|
| <b>Grade 1</b> | <ul style="list-style-type: none"><li>• no subarachnoid (SAH) or intraventricular hemorrhage (IVH) detected</li><li>• incidence of symptomatic vasospasm: 21%</li></ul>           |
| <b>Grade 2</b> | <ul style="list-style-type: none"><li>• diffuse thin (&lt;1 mm) SAH</li><li>• no clots</li><li>• incidence of symptomatic vasospasm: 25%</li></ul>                                |
| <b>Grade 3</b> | <ul style="list-style-type: none"><li>• localized clots and/or layers of blood &gt;1 mm in thickness</li><li>• no IVH</li><li>• incidence of symptomatic vasospasm: 37%</li></ul> |
| <b>Grade 4</b> | <ul style="list-style-type: none"><li>• diffuse or no SAH</li><li>• ICH or IVH present</li><li>• incidence of symptomatic vasospasm: 31%</li></ul>                                |

Table 5. Therapy intensity Level Scale. Abbreviations: ICP, intracranial pressure; CPP, cerebral perfusion pressure; CSF, cerebrospinal fluid; CO<sub>2</sub>, carbon dioxide;

| ITEM                                | DETAILS                                                                     | SPECIFICS             | SCORE | MAX |
|-------------------------------------|-----------------------------------------------------------------------------|-----------------------|-------|-----|
| Positioning                         | head elevation for ICP control                                              |                       | 1     | 1   |
|                                     | nursed flat (180°) for CPP management                                       |                       | 1     |     |
| Sedation and neuromuscular blockade | low dose sedation (as required for mechanical ventilation)                  |                       | 1     | 8   |
|                                     | higher dose sedation for ICP control (but not aiming for burst suppression) |                       | 2     |     |
|                                     | high dose propofol or barbiturates for ICP control (metabolic suppression)  |                       | 5     |     |
|                                     | neuromuscular blockade (paralysis)                                          |                       | 3     |     |
| CSF drainage                        | CSF drainage – low volume                                                   | < 120ml/day (< 5ml/h) | 2     | 3   |
|                                     | CSF drainage – high volume                                                  | ≥ 120ml/day (≥ 5ml/h) | 3     |     |
| CPP management                      | fluid loading for maintenance of cerebral perfusion                         |                       | 1     | 2   |
|                                     | vasopressor therapy required for management of cerebral perfusion           |                       | 1     |     |
| Ventilatory management              | mild hypocapnia for ICP control, based on arterial CO <sub>2</sub> in mmHg  | ≥ 35, < 40            | 1     | 4   |
|                                     | moderate hypocapnia for ICP control                                         | ≥ 30, < 35            | 2     |     |
|                                     | intensive hypocapnia for ICP control                                        | < 30                  | 4     |     |
| Hyperosmolar therapy                | mannitol                                                                    | ≤ 2g/kg/24h           | 2     | 6   |
|                                     | mannitol                                                                    | > 2g/kg/24h           | 3     |     |
|                                     | hypertonic saline                                                           | ≤ 0.3g/kg/24h         | 2     |     |
|                                     | hypertonic saline                                                           | > 0.3g/kg/24h         | 3     |     |

|  |                                                                                |  |   |    |
|--|--------------------------------------------------------------------------------|--|---|----|
|  |                                                                                |  |   |    |
|  | treatment of fever (T > 38°C or spontaneous T < 34.5°C)                        |  | 1 |    |
|  | cooling for ICP control, ≥ 35°C                                                |  | 2 |    |
|  | hypothermia < 35°C                                                             |  | 5 |    |
|  | intracranial operation for progressive mass lesion, NOT scheduled on admission |  | 4 |    |
|  | decompressive craniectomy                                                      |  | 5 |    |
|  | Maximum total possible score                                                   |  |   | 38 |

Table 6. Extended Glasgow Outcome Scale

| Category number | Definition                |
|-----------------|---------------------------|
| 1               | Upper good recovery       |
| 2               | Lower good recovery       |
| 3               | Upper moderate disability |
| 4               | Lower moderate disability |
| 5               | Upper severe disability   |
| 6               | Lower severe disability   |
| 7               | Vegetative State          |
| 8               | Death                     |

1  
2  
3  
4  
5  
6  
7  
8  
9  
10  
11  
12  
13  
14  
15  
16  
17  
18  
19  
20  
21  
22  
23  
24  
25  
26  
27  
28  
29  
30  
31  
32  
33  
34  
35  
36  
37  
38  
39  
40  
41  
42  
43  
44  
45  
46  
47  
48  
49  
50  
51  
52  
53  
54  
55  
56  
57  
58  
59  
60

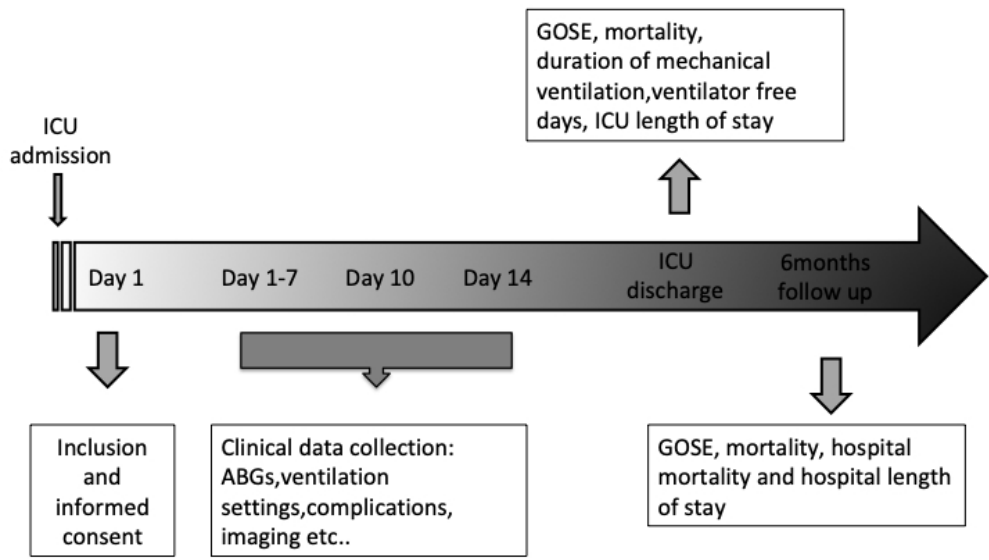

254x190mm (72 x 72 DPI)

# BMJ Open

## Multicenter observational study on practice of ventilation in brain injured patients: the VENTIBRAIN study protocol

|                                 |                                                                                                                                                                                                                                                                                                                                                                                                                                                                                                                                    |
|---------------------------------|------------------------------------------------------------------------------------------------------------------------------------------------------------------------------------------------------------------------------------------------------------------------------------------------------------------------------------------------------------------------------------------------------------------------------------------------------------------------------------------------------------------------------------|
| Journal:                        | <i>BMJ Open</i>                                                                                                                                                                                                                                                                                                                                                                                                                                                                                                                    |
| Manuscript ID                   | bmjopen-2020-047100.R2                                                                                                                                                                                                                                                                                                                                                                                                                                                                                                             |
| Article Type:                   | Protocol                                                                                                                                                                                                                                                                                                                                                                                                                                                                                                                           |
| Date Submitted by the Author:   | 11-Jul-2021                                                                                                                                                                                                                                                                                                                                                                                                                                                                                                                        |
| Complete List of Authors:       | Robba, Chiara; Ospedale Policlinico San Martino, Neurocritical Care Unit Citerio, Giuseppe; University of Milan-Bicocca, School of Medicine; ASST di Monza, Emergency and Urgency<br>Taccone, Fabio; Erasmus Hospital<br>Galimberti, Stefania; Università degli Studi di Milano-Bicocca, School of Medicine<br>Rebora, Paola; University of Milan-Bicocca<br>Vargiolu, Alessia; University of Milan-Bicocca<br>Pelosi, Paolo; Ospedale Policlinico San Martino Istituto di Ricovero e Cura a Carattere Scientifico per l'Oncologia |
| <b>Primary Subject Heading</b>: | Intensive care                                                                                                                                                                                                                                                                                                                                                                                                                                                                                                                     |
| Secondary Subject Heading:      | Intensive care                                                                                                                                                                                                                                                                                                                                                                                                                                                                                                                     |
| Keywords:                       | Adult intensive & critical care < ANAESTHETICS, Neurological injury < NEUROLOGY, Neurophysiology < NEUROLOGY                                                                                                                                                                                                                                                                                                                                                                                                                       |
|                                 |                                                                                                                                                                                                                                                                                                                                                                                                                                                                                                                                    |

SCHOLARONE™  
Manuscripts



I, the Submitting Author has the right to grant and does grant on behalf of all authors of the Work (as defined in the below author licence), an exclusive licence and/or a non-exclusive licence for contributions from authors who are: i) UK Crown employees; ii) where BMJ has agreed a CC-BY licence shall apply, and/or iii) in accordance with the terms applicable for US Federal Government officers or employees acting as part of their official duties; on a worldwide, perpetual, irrevocable, royalty-free basis to BMJ Publishing Group Ltd ("BMJ") its licensees and where the relevant Journal is co-owned by BMJ to the co-owners of the Journal, to publish the Work in this journal and any other BMJ products and to exploit all rights, as set out in our [licence](#).

The Submitting Author accepts and understands that any supply made under these terms is made by BMJ to the Submitting Author unless you are acting as an employee on behalf of your employer or a postgraduate student of an affiliated institution which is paying any applicable article publishing charge ("APC") for Open Access articles. Where the Submitting Author wishes to make the Work available on an Open Access basis (and intends to pay the relevant APC), the terms of reuse of such Open Access shall be governed by a Creative Commons licence – details of these licences and which [Creative Commons](#) licence will apply to this Work are set out in our licence referred to above.

Other than as permitted in any relevant BMJ Author's Self Archiving Policies, I confirm this Work has not been accepted for publication elsewhere, is not being considered for publication elsewhere and does not duplicate material already published. I confirm all authors consent to publication of this Work and authorise the granting of this licence.

1  
2  
3 Multicenter observational study on practice of ventilation in brain injured patients:  
4  
5 the VENTIBRAIN study protocol  
6  
7  
8  
9

10 Chiara Robba<sup>1,5a</sup>, Giuseppe Citerio<sup>2a</sup>, Fabio Silvio Taccone<sup>3</sup>, Stefania Galimberti<sup>4</sup>,  
11 Paola Rebori<sup>4</sup>, Alessia Vargiolu<sup>2</sup>, Paolo Pelosi<sup>1,5</sup>, VENTIBRAIN Steering committee\*  
12  
13  
14

15  
16 <sup>1</sup>San Martino Policlinico Hospital, IRCCS for Oncology and Neuroscience, Genoa, Italy  
17

18  
19 <sup>2</sup>School of Medicine and Surgery, University of Milano Bicocca, Milan, Italy. OrciD  
20 0000-0002-5374-3161  
21  
22

23  
24 <sup>3</sup>Department of Intensive Care Medicine, Erasme Hospital, Université Libre de  
25 Bruxelles, Brussels, Belgium  
26  
27

28  
29 <sup>4</sup>Bicocca Bioinformatics Biostatistics and Bioimaging B4 Center, School of Medicine  
30 and Surgery, University of Milano - Bicocca, Monza, Italy  
31  
32

33  
34 <sup>5</sup>Department of Surgical Sciences and Integrated Diagnostics, University of Genoa,  
35 Genoa, Italy  
36  
37

38  
39  
40 <sup>a</sup>The authors have equally contributed  
41  
42  
43  
44  
45

46 Corresponding author:

47 Chiara Robba, PhD

48 [kiarobba@gmail.com](mailto:kiarobba@gmail.com)

49 Policlinico San Martino, Genova, Italy  
50  
51  
52  
53  
54  
55  
56  
57  
58  
59  
60



1  
2  
3  
4  
5  
6  
7  
8  
9  
10  
11  
12 \*VENTIBRAIN Enlarged Steering committee

13 Maura Mandelli, San Martino Policlinico Hospital, IRCCS for Oncology and  
14 Neuroscience, Genoa, Italy

15  
16 Jordi Mancebo, Servei de Medicina Intensiva, Hospital de Sant Pau, Barcelona, Spain

17 Robert Stevens, Departments of Anesthesiology and Critical Care Medicine,  
18 Neurology, and Neurosurgery, Johns Hopkins University School of Medicine,  
19 Baltimore, MD

20  
21 Geert Meyfroidt, Department and Laboratory of Intensive Care Medicine, University  
22 Hospitals Leuven and KU Leuven, Herestraat 49, Box 7003 63, 3000 Leuven, Belgium

23 Rafael Badenes Department of Anesthesiology and Surgical-Trauma Intensive Care,  
24 Hospital Clinic Universitari de Valencia, Department of Surgery, University of  
25 Valencia, Valencia, Spain

26  
27 Valentina Della Torre, Intensive Care Unit, St Mary's Hospital, London, UK

28 Raimund Helbok Department of Neurology, Neurological Intensive Care Unit,  
29 Medical University of Innsbruck, Anichstrasse 35, 6020, Innsbruck, Austria.

30 Jose' Suarez Department of Anesthesiology and Critical Care Medicine, Neurology,  
31 and Neurosurgery, Johns Hopkins University School of Medicine, Baltimore, MD

32 Nino Stocchetti Department of Physiopathology and Transplantation, Milan  
33 University, Milan, Italy; Neuro Intensive Care Unit, Fondazione Erasmus Medical  
34 Center, Ca Granda Ospedale Maggiore Policlinico Milano, Milan, Italy

35 Marcelo Gama De Abreu Department of Anaesthesiology and Intensive Care  
36 Medicine, Pulmonary Engineering Group, University Hospital Carl Gustav Carus at  
37 the Technische Universität Dresden, Fetscherstr. 74, 01307, Dresden, Germany.

38 Marcus Schultz Department of Intensive Care Medicine and Laboratory of  
39 Experimental Intensive Care and Anesthesiology, Academic Medical Center,  
40 University of Amsterdam, Amsterdam, The Netherlands.

41  
42 Raphael Cinotti Department of Anaesthesia and Critical Care, Hôpital Guillaume et  
43 René Laennec, University Hospital of Nantes, Saint-Herblain, France

44 Louis Blanch Critical Care Center, Institut d'Investigació i Innovació Parc Taulí I3PT,  
45 Hospital Universitari Parc Taulí, Sabadell, Spain. lblanch@tauli.cat.

46  
47 Centro de Investigación Biomédica en Red Enfermedades Respiratorias (CIBERES),  
48 Instituto de Salud Carlos III, Madrid, Spain.

49 Karim Asehnoune Department of Anaesthesia and Critical Care, Hôtel Dieu,  
50 University Hospital of Nantes, Nantes, France

51  
52 Christian Putensen Department of Anaesthesiology and Intensive Care Medicine,  
53 University Clinical Center Bonn, Bonn, North Rhine-Westphalia, Germany

54 John Laffey School of Medicine, National University of Ireland Galway (NUIG),  
55 Galway, Ireland  
56  
57  
58  
59  
60

## ABSTRACT

### Introduction

Mechanical ventilatory is a crucial element of acute brain injured patients' management. The ventilatory goals to ensure lung protection during acute respiratory failure may not be adequate in case of concomitant brain injury. Therefore, there are limited data from which physicians can draw conclusions regarding optimal ventilator management in this setting.

### Methods and analysis

This is an international multicenter prospective observational cohort study. The aim of the "Multicenter observational study on practice of ventilation in brain injured patients"-the VENTIBRAIN study- is to describe the current practice of ventilator settings and mechanical ventilation in acute brain injured patients.

Secondary objectives include the description of ventilator settings among different countries, and their association with outcomes.

Inclusion criteria will be adult patients admitted to the intensive care unit (ICU) with a diagnosis of traumatic brain injury or cerebrovascular diseases (intracranial hemorrhage, subarachnoid hemorrhage, ischemic stroke), requiring intubation and mechanical ventilation and admission to the ICU. Exclusion criteria will be the following: patients aged < 18 years; pregnant patients; patients not intubated or not mechanically ventilated or receiving only non-invasive ventilation. Data related to clinical examination, neuromonitoring if available, ventilator settings and arterial blood gases will be recorded at admission and daily for the first 7 days and then at day 10 and 14. The Glasgow Outcome Scale Extended on mortality and neurological outcome (GOSE) will be collected at discharge from ICU, hospital and at 6 months follow-up.

### Ethics and dissemination

The study has been approved by the Ethic committee of Brianza at the Azienda Socio Sanitaria Territoriale (ASST)-Monza. Data will be disseminated to the scientific community by abstracts submitted to the European Society of Intensive Care Medicine annual conference and by original articles submitted to peer-reviewed journals.

1  
2  
3  
4  
5 **Trial registration number:** NCT04459884  
6  
7  
8  
9

10 **Keywords:** mechanical ventilation; brain injury; ventilator settings; outcome;  
11  
12 Glasgow coma scale  
13  
14  
15  
16

17 **Strengths and limitations of the study**

- 18  
19 - Results from this large multicenter study including mechanically ventilated  
20 acute brain injury patients admitted to the intensive care unit will provide a  
21 detailed description of the patients' characteristics, ventilator strategies, and  
22 their association to clinical outcomes.  
23  
24 - The main strength of this study relies on the global approach, since it allows  
25 to explore clinical practice in a wide number of geographical regions with  
26 different public health issues, including low- and middle-income countries.  
27  
28 - The main limitation of this study relies on the observational design with  
29 consequent difficulty to draw causal inferences.  
30  
31 - The results from this study will generate hypotheses for respiratory  
32 management of acute brain injured patients and help in better study design  
33 plans for future randomized controlled trials.  
34  
35  
36  
37  
38  
39  
40  
41  
42  
43  
44  
45  
46  
47  
48  
49  
50  
51  
52  
53  
54  
55  
56  
57  
58  
59  
60

**List of abbreviations and relevant definitions**

ABI Acute Brain Injury

ARDS Acute Respiratory Distress Syndrome

CA Competent Authority

COPD Chronic Obstructive Pulmonary Disease

CPP Cerebral Perfusion Pressure

CRF Case Report Form

CT Computerized Tomography

DSMB Data safety Managing Board

ESICM European Society of Intensive Care Medicine

GCP General Clinical Practice

GCS Glasgow Coma Scale

GOSE Glasgow Extended Outcome Scale

ICP Intra Cranial Pressure

ICU Intensive Care Unit

ICH Intra Cerebral Hemorrhage

MAP Mean Arterial Pressure

MV Mechanical Ventilation

NC National Coordinator

PaO<sub>2</sub> Arterial Partial Pressure of Carbon Dioxide

PaO<sub>2</sub> Arterial Partial Pressure of Oxygen

PbO<sub>2</sub> Brain Tissue Oxygen Tension

PBW Predicted body weight

PEEP Positive End–expiratory Pressure

PI Principal Investigator

RM Recruitment Maneuvers

SAH – Subarachnoid Hemorrhage

SC Steering Committee

TCD Trans Cranial Doppler

TV Tidal Volume

VALI Ventilator–associated Lung Injury

WBP Personal Data Protection Act

WMO Medical Research Involving Human Subjects Act

## BACKGROUND AND RATIONALE

Mechanical ventilation (MV) is a frequently applied and often a life-saving strategy in severely brain injured patients.<sup>1</sup> Paradoxically, ventilation itself has the potential to cause further pulmonary and cerebral damage and can increase mortality and morbidity.<sup>2</sup> Several experimental and clinical studies have shown how brain injury can cause secondary lung injury.<sup>2-4</sup> Lung injury could be due either to mechanical ventilation, which is often necessary in brain injured patients, or to inflammatory response that follows primary acute brain injury, or a combination of both mechanisms.<sup>5</sup>

The so-called '*protective lung ventilation*' strategies include the use of low tidal volume (TV), positive end expiratory pressure (PEEP), and eventually recruitment maneuvers (RMs), and are aimed to prevent lung damage and to reduce morbidity and mortality in patients with acute respiratory distress syndrome (ARDS).<sup>6,7</sup> In particular, the use of low tidal volume seems to have the greater importance,<sup>8-11</sup> and it is recommended in critically ill patients with ARDS.<sup>12</sup>

Results from one multicenter randomized controlled trial suggest that intensive care unit (ICU) patients without ARDS could also benefit from '*protective lung ventilation strategies*'.<sup>13</sup> A recent meta-analysis showed a higher incidence of pulmonary complications and even increased mortality in patients who received '*conventional ventilation*' with traditionally sized or higher tidal volumes compared to patients undergoing protective strategies.<sup>14</sup>

Therefore, the concept of '*protective lung ventilation*' has led to a clinical approach, which seems to reduce morbidity and mortality of ICU patients with ARDS but can also have a beneficial effect on patients with healthy lungs and in the perioperative settings. However, these recommendations often come into conflict with the management of patients affected by acute brain injury, because low tidal volumes, high PEEP and RMs can increase carbon dioxide levels (CO<sub>2</sub>) and increase intrathoracic pressure, thus having detrimental effects on intracranial pressure (ICP) and cerebral perfusion pressure (CPP).<sup>15-17</sup> Because of this, brain injured patients have been traditionally excluded from the major trials regarding mechanical ventilation. There is therefore still uncertainty regarding the use of protective ventilation in brain injured ill patients and, as pointed out by a recent consensus of

1  
2  
3 experts,<sup>18</sup> a multicenter international study on mechanical ventilation strategies in  
4 brain injured patients is currently needed.  
5  
6  
7

## 8 **METHODS**

### 9 **Study design**

10 We designed a large international multicenter prospective observational cohort  
11 study including mechanically ventilated brain injured patients and planned 6-month  
12 follow-up.  
13  
14  
15  
16  
17

### 18 **Objectives**

19 Primary objective is to describe ventilation settings of intubated and mechanically  
20 ventilated neurocritically ill patients admitted to the ICU.  
21  
22

23 Secondary objectives are:  
24

- 25 - To describe the differences in ventilator settings among different countries.
- 26 - To evaluate the association of ventilator settings with pulmonary complications  
27 (including pneumonia, acute distress respiratory failure, neurogenic pulmonary  
28 edema).
- 29 -To describe differences in the ventilator settings in presence/absence of high  
30 intracranial pressure.
- 31 - To evaluate the association of ventilator settings with outcomes (i.e. 6-months  
32 mortality and neurological outcome, in-hospital and ICU mortality, hospital length of  
33 stay, duration of mechanical ventilation, ventilator free days at ICU discharge).  
34  
35  
36  
37  
38  
39  
40  
41  
42  
43  
44  
45  
46

### 47 **Study population**

48 We will collect data of consecutive patients with acute brain injury requiring  
49 endotracheal intubation and mechanical ventilation, who are admitted to the  
50 intensive care unit (ICU).  
51  
52  
53  
54  
55

### 56 **Inclusion criteria will be:**

- Age  $\geq$  18 years.
- Patients admitted to the ICU with a diagnosis of a primary non-anoxic brain injury, such as:
  - Traumatic brain injury (TBI)
  - Cerebrovascular diseases (intracranial hemorrhage, ICH; subarachnoid hemorrhage, SAH; acute ischemic stroke, AIS)
- Patients requiring intubation, mechanical ventilation, or needing mechanical ventilation during ICU stay.

### Exclusion criteria

- Age < 18 years.
- Pregnant patients.
- Patients not intubated or not mechanically ventilated or receiving only non-invasive ventilation (i.e., patient never received invasive ventilation during the present admission).

### Outcomes

Enrolled patients will be followed until ICU-hospital discharge or death, whatever comes first and at 6 months follow up.

Outcomes will be assessed as:

- 6-months mortality and neurological outcome (as for extended Glasgow Outcome Scale, GOSE).
- Pulmonary complications (defined as: acute distress respiratory failure, pulmonary infection, pneumothorax, pleural effusion, atelectasis, non-cardiogenic pulmonary edema).
- In-hospital and ICU mortality.
- Hospital length of stay (LOS) in patients discharged alive.
- Duration of mechanical ventilation (in days), ventilator free days (days) at ICU discharge.

### Study procedures and settings

The protocol has been endorsed by the European Society of Intensive Care Medicine (ESICM). Worldwide, more than 200 centers from 56 countries have been contacted to participate in the VENTIBRAIN study (more information at <https://www.esicm.org/research/trials/endorsed-trials/ongoing-projects-endorsed/>).

The established recruitment window will open in spring-summer 2021. The inclusion period will be flexible for participating centers and determined at a later stage together with the study-coordinator. Centers will enroll consecutive patients for a minimum period of 3 months to a maximum period of 6 months.

Patients in participating centers will be screened on a daily basis. After 6 months from recruitment, the patients or their family members will be contacted by phone for the follow-up evaluation.

### Data collection

The following data will be collected at admission, and daily until day 7, and then at day 10 and 14 (Figure1):

- Demographic data and baseline clinical data, including neurological, neuroradiological and respiratory severity scores (Table 1-4), neuromonitoring data, and the occurrence of neurological and systemic complications.
- Ventilator settings, in particular: modality of ventilator, tidal volume, plateau pressure, peak pressure, mean airway pressure, positive end expiratory pressure, respiratory rate, inspired fraction of oxygen.
- Gas exchange variables and vital parameters.
- Chest radiography data from available chest X-rays and/or Computed Tomography (i.e., no extra chest X-rays are obtained).
- Therapy Intensity Levels (TILs) and predefined complications recorded from medical chart (Table 5).

At ICU and hospital discharge, data on mortality, length of stay (days) duration of mechanical ventilation (in days), ventilator free days (days) will be collected.



1  
2  
3 At 6-months, mortality and neurological outcome (as for extended Glasgow  
4 Outcome Scale, GOSE, Table 6) will be collected.  
5  
6  
7

8  
9 The GOSE at 6 months follow-up will be collected via phone-structured interviews to  
10 the patients and/or family members using a validated questionnaire.<sup>19</sup>Data on the  
11 cause and date of death will be also collected.  
12  
13  
14

## 15 16 **Data management**

17  
18  
19 Anonymized data will be collected in a web-based electronic Case-Report Form  
20 (eCRF) and protected by encryption software and password provided to single users.  
21 Each patient will be associated to a numeric code generated by the central database.  
22 Data will be checked for consistency and completeness by the study coordinator and  
23 the core Steering Committee, to ensure the high quality of the collected data before  
24 the analysis and to limit the rate of errors and missing data. Also, a strict monitoring  
25 of data quality during the study will be performed.  
26  
27  
28  
29  
30  
31  
32

33 The data will be securely stored at the University Milano-Bicocca; all procedures will  
34 comply with the EU Regulation 2016/679 on the protection of natural persons  
35 regarding personal data processing and movement. A Data Transfer Agreement to  
36 confirm the terms for data transfer from the centers to the Sponsor will be finalized.  
37 Patients' demographic characteristics, co-morbidities, diagnosis, timing of acute  
38 events and clinical presentation of acute brain injury will be extracted from the  
39 patients' medical records.  
40  
41  
42  
43  
44  
45  
46  
47

## 48 **STATISTICAL ANALYSIS**

### 49 **Sample size calculation**

50  
51 Since the hypotheses of the study are exploratory, no formal sample size calculation  
52 has been performed. This international prospective observational study aims to  
53 recruit more than 3000 patients after acute brain damage. Recruitment will last 3-6  
54 months at each center, aiming to enroll an average of 30 consecutive  
55 patients/center. This timeframe has been set according to a previous study<sup>20</sup> similar  
56  
57  
58  
59  
60

1  
2  
3 to VENTIBRAIN, and including a similar network of centers. The number of enrolled  
4 patients and ICUs is considered adequate to capture the range of variation in  
5 ventilator settings observed in the clinical practice. We aim to include also low-  
6 middle income countries, in order to have a representation of the variability  
7 worldwide.  
8  
9  
10  
11  
12

### 13 **Plan of analysis**

14 Patient and ventilation characteristics will be described by means (standard  
15 deviation), medians (I-III quartiles) and proportions, as appropriate. The different  
16 ventilator settings will be described according to type of brain injury (i.e. TBI, AIS and  
17 SAH), presence and severity of lung damage and countries. The association between  
18 daily ventilator settings and outcomes will be evaluated by appropriate multivariable  
19 models adjusting for relevant confounders at baseline (such as age, sex,  
20 cardiovascular and neurological history, primary diagnosis, Glasgow Coma Scale  
21 (GCS), pupillary reactivity and the severity of pulmonary and neurological  
22 conditions). We will explore the role of currently known thresholds for other ICU  
23 populations of ventilator settings; however, as in this population no specific  
24 thresholds have been defined, we will aim to assess the distribution of these settings  
25 and eventually define new thresholds for the brain injured population.  
26  
27  
28  
29  
30  
31  
32  
33  
34  
35  
36  
37

38 Cause specific Cox model will be applied to time to event outcomes (i.e., mortality,  
39 pulmonary complications) and logistic regression to dichotomous outcomes (i.e.  
40 poor neurological outcome at 6 month, GOSE <5). Multilevel regression models will  
41 be applied to account for repeated measurements on patients and heterogeneity  
42 induced by centers and, if residual variation is present, by countries.  
43  
44  
45  
46

47 The cumulative incidence in time of pulmonary complications during hospital stay  
48 will be estimated along with 95% confidence intervals accounting for mortality and  
49 discharge as competing events by the Aalen-Johansen estimator.  
50  
51

52 The occurrence of raised intracranial pressure value lasting more than 5 minutes >20  
53 mmHg will be described daily together with the earlier ventilator settings. A  
54 multilevel longitudinal model on daily raised intracranial pressure will be also applied  
55 to evaluate the possible impact of ventilator settings adjusting for relevant  
56 confounders (as defined before); this model will include only ICP monitored patients.  
57  
58  
59  
60

1  
2  
3 A sensitivity analysis excluding data from centers that recruited less than 20 patients  
4 will be performed. Multiple imputation on covariates will be performed if missing  
5 data will exceed 10%. Statistical analyses will be conducted using R and SAS.  
6  
7  
8  
9

#### 10 **Patient and Public Involvement**

11 No patient involved.  
12  
13

### 14 **ETHICAL CONSIDERATIONS**

#### 15 **Ethical standards**

16 The PI and Steering Committee will ensure that this study is conducted in full  
17 conformity with the Declaration of Helsinki and Good Clinical Practices.  
18  
19

#### 20 **Ethics committee**

21 Each NC/PI will notify the relevant ethics committee, in compliance with the local  
22 legislation and rules. The national coordinators will facilitate this process. The  
23 approval of the protocol (if required by local authorities) must be obtained before  
24 any participant is enrolled. Any amendment to the protocol will require review and  
25 approval by the SC before the changes are implemented to the study.  
26  
27  
28  
29  
30  
31  
32  
33

#### 34 **Lack of capacity and Delayed Consent**

35 Informed consent will be obtained from patients with no lack of capacity. For  
36 patients not able to provide informed consent at the time of recruitment, the  
37 responsible clinical/research staff will act as Consulter and consent eligible patients  
38 after discussion with the next of kin. If the patient has a Power of Attorney or a Legal  
39 tutor or an, he/she will act as Consultee and will be asked to consent/decline  
40 participation to the study on legal behalf of the patient.  
41  
42  
43  
44  
45  
46  
47

48 In presence of patients' Advance Decision Plan, including participation in research  
49 studies, the Plan will be respected and recruitment pursued/abandoned accordingly.  
50

51 At follow-up, patients who have regained capacity will be asked to provide Informed  
52 Consent and will be given the possibility to:  
53

- 54 • Provide Informed Consent for the acute data and follow-up.
- 55 • Deny research participation and request destruction of acute data collected.
- 56
- 57
- 58
- 59
- 60

## Dissemination

Data will be disseminated to the scientific community by abstracts submitted to the European Society of Intensive Care Medicine annual conference and by original articles submitted to peer-reviewed journals.

## Publication and data sharing policy

### Data sharing policy

After the publication of the main papers, any requests for the use of the data will be made to the VENTIBRAIN Core Steering Committee (CR, GC, PP, FST), and decisions will be made in relation to these requests. The VENTIBRAIN investigators will have priority in requests to use the data set for subsequent studies.

### Publication and Authorship

Data will be made available to the scientific community by means of abstract by scientific papers submitted to peer-reviewed journals. Authorship of the main manuscript will follow the ICMJE recommendations that base authorship on the following 4 criteria:

- Substantial contributions to the conception or design of the work; or the acquisition, analysis, or interpretation of data for the work; AND
- Drafting the work or revising it critically for important intellectual content; AND
- Final approval of the version to be published; AND
- Agreement to be accountable for all aspects of the work in ensuring that questions related to the accuracy or integrity of any part of the work are appropriately investigated and resolved.

A writing committee composed by the members of the core steering committee and biostatisticians and a part of the enlarged steering committee will draft the manuscript and will be author of the manuscript. National coordinators will be authors if they will fulfill the ICMJE criteria and if they will promote the enrolment of at least 300 patients in their country. All the participant centers will be granted in the group authorship, "VENTIBRAIN". The corresponding author will specify the group name and will clearly identify the group members who can take credit and responsibility for the work as collaborators. For each center, a participant will be

1  
2  
3 indicated in the group authorship list every 10 patients enrolled. The ESICM support  
4 will be acknowledged in each publication generated from the study. In the main  
5 manuscripts, CR will have the first authorship, and PP will be the last author. After  
6 publication of the primary results, on request the pooled dataset will be available for  
7 all members of the VENTIBRAIN collaborators for preplanned substudies and  
8 secondary analysis, after judgement and approval of scientific quality and validity  
9 statement guidelines and checklists. Each secondary analysis or substudy approved  
10 will have to include part of the core Steering Committee as authors. Preplanned  
11 analyses include the evaluation of blood gas values (such as oxygen and carbon  
12 dioxide) and their association with patient's outcome, and the assessment of  
13 mechanical power used in this cohort of patients and its effect on outcomes.  
14  
15  
16  
17  
18  
19  
20  
21  
22  
23  
24

## 25 **DISCUSSION AND EXPECTED IMPACT OF THE STUDY**

26 VENTIBRAIN is designed to obtain a detailed description of patient's characteristics,  
27 management strategies resource use and association with clinical outcomes across  
28 many centers/countries. In particular, the study will provide insights in relation to  
29 clinical management, monitoring and treatment, practice variation in neuro-  
30 intensive care units around the world, differences in the ventilator management of  
31 brain injured patients and their potential association with outcome.  
32  
33  
34  
35  
36  
37  
38

39 VENTIBRAIN has several strengths. First, its prospective design will increase the  
40 accuracy of data collection with potential minimization of the chance of residual  
41 confounding by unmeasured variables, which is a common limitation of  
42 retrospective design. Second, we aim to obtain a large sample size, able to provide  
43 information on neurological and systemic complications in mechanically ventilated  
44 brain injured patients, and eventually evaluate potential associations between  
45 ventilator settings and ICU/ 6 months patients' outcomes. Third, the inclusion of a  
46 large number of patients from different centers (dedicated and not dedicated  
47 neuroICUs), and countries, including low-income countries will provide information  
48 on geoeconomics differences in epidemiology, management strategies and  
49 outcomes of mechanically ventilated brain injured patients.  
50  
51  
52  
53  
54  
55  
56  
57  
58  
59  
60

1  
2  
3 The need to particularly focus on the mechanical ventilator settings in this group of  
4 patients is related to the specific ventilator needs of brain injured patients.<sup>18,21</sup> Brain  
5 injured patients have a high number of pulmonary complications, ventilator  
6 associated pneumonia, and a high rate of need of tracheostomy and extubation  
7 failure.<sup>22</sup>

8  
9  
10  
11  
12 The optimal oxygenation and carbon dioxide targets are not clear in this population.  
13 Hypoxia has been largely recognized as a major cause of secondary brain injury;  
14 recently, also hyperoxia has shown to have potential detrimental effects on patients'  
15 outcome.<sup>23,24</sup>

16  
17  
18 Similarly, hypercapnia can cause cerebral vasodilation and increase intracranial  
19 pressure and should therefore be avoided, but hypocapnia and cerebral  
20 vasoconstriction can lead to cerebral ischemia and currently it is suggested only in  
21 case of life-threatening intracranial hypertension and risk of brain herniation.<sup>25,26</sup>

22  
23 All in it, ventilator targets are unclear in this group of patients.

24  
25  
26 Moreover, the general principles and ventilator settings applied in the general  
27 population have not been established in brain injured patients.<sup>19</sup>

28  
29  
30 Recent literature has highlighted the importance of protective ventilation in ARDS  
31 and non-ARDS patients,<sup>27-32</sup> as well as weaning protocols. However, country-specific  
32 practices, the lack of clear guidelines in the neuroICU population or different  
33 resources among countries may affect the implementation of all these interventions.

34  
35  
36  
37  
38  
39  
40  
41  
42  
43  
44  
45  
46  
47  
48  
49  
50  
51  
52  
53  
54  
55  
56  
57  
58  
59  
60  
61  
62  
63  
64  
65  
66  
67  
68  
69  
70  
71  
72  
73  
74  
75  
76  
77  
78  
79  
80  
81  
82  
83  
84  
85  
86  
87  
88  
89  
90  
91  
92  
93  
94  
95  
96  
97  
98  
99  
100  
101  
102  
103  
104  
105  
106  
107  
108  
109  
110  
111  
112  
113  
114  
115  
116  
117  
118  
119  
120  
121  
122  
123  
124  
125  
126  
127  
128  
129  
130  
131  
132  
133  
134  
135  
136  
137  
138  
139  
140  
141  
142  
143  
144  
145  
146  
147  
148  
149  
150  
151  
152  
153  
154  
155  
156  
157  
158  
159  
160  
161  
162  
163  
164  
165  
166  
167  
168  
169  
170  
171  
172  
173  
174  
175  
176  
177  
178  
179  
180  
181  
182  
183  
184  
185  
186  
187  
188  
189  
190  
191  
192  
193  
194  
195  
196  
197  
198  
199  
200  
201  
202  
203  
204  
205  
206  
207  
208  
209  
210  
211  
212  
213  
214  
215  
216  
217  
218  
219  
220  
221  
222  
223  
224  
225  
226  
227  
228  
229  
230  
231  
232  
233  
234  
235  
236  
237  
238  
239  
240  
241  
242  
243  
244  
245  
246  
247  
248  
249  
250  
251  
252  
253  
254  
255  
256  
257  
258  
259  
260  
261  
262  
263  
264  
265  
266  
267  
268  
269  
270  
271  
272  
273  
274  
275  
276  
277  
278  
279  
280  
281  
282  
283  
284  
285  
286  
287  
288  
289  
290  
291  
292  
293  
294  
295  
296  
297  
298  
299  
300  
301  
302  
303  
304  
305  
306  
307  
308  
309  
310  
311  
312  
313  
314  
315  
316  
317  
318  
319  
320  
321  
322  
323  
324  
325  
326  
327  
328  
329  
330  
331  
332  
333  
334  
335  
336  
337  
338  
339  
340  
341  
342  
343  
344  
345  
346  
347  
348  
349  
350  
351  
352  
353  
354  
355  
356  
357  
358  
359  
360  
361  
362  
363  
364  
365  
366  
367  
368  
369  
370  
371  
372  
373  
374  
375  
376  
377  
378  
379  
380  
381  
382  
383  
384  
385  
386  
387  
388  
389  
390  
391  
392  
393  
394  
395  
396  
397  
398  
399  
400  
401  
402  
403  
404  
405  
406  
407  
408  
409  
410  
411  
412  
413  
414  
415  
416  
417  
418  
419  
420  
421  
422  
423  
424  
425  
426  
427  
428  
429  
430  
431  
432  
433  
434  
435  
436  
437  
438  
439  
440  
441  
442  
443  
444  
445  
446  
447  
448  
449  
450  
451  
452  
453  
454  
455  
456  
457  
458  
459  
460  
461  
462  
463  
464  
465  
466  
467  
468  
469  
470  
471  
472  
473  
474  
475  
476  
477  
478  
479  
480  
481  
482  
483  
484  
485  
486  
487  
488  
489  
490  
491  
492  
493  
494  
495  
496  
497  
498  
499  
500  
501  
502  
503  
504  
505  
506  
507  
508  
509  
510  
511  
512  
513  
514  
515  
516  
517  
518  
519  
520  
521  
522  
523  
524  
525  
526  
527  
528  
529  
530  
531  
532  
533  
534  
535  
536  
537  
538  
539  
540  
541  
542  
543  
544  
545  
546  
547  
548  
549  
550  
551  
552  
553  
554  
555  
556  
557  
558  
559  
560  
561  
562  
563  
564  
565  
566  
567  
568  
569  
570  
571  
572  
573  
574  
575  
576  
577  
578  
579  
580  
581  
582  
583  
584  
585  
586  
587  
588  
589  
590  
591  
592  
593  
594  
595  
596  
597  
598  
599  
600  
601  
602  
603  
604  
605  
606  
607  
608  
609  
610  
611  
612  
613  
614  
615  
616  
617  
618  
619  
620  
621  
622  
623  
624  
625  
626  
627  
628  
629  
630  
631  
632  
633  
634  
635  
636  
637  
638  
639  
640  
641  
642  
643  
644  
645  
646  
647  
648  
649  
650  
651  
652  
653  
654  
655  
656  
657  
658  
659  
660  
661  
662  
663  
664  
665  
666  
667  
668  
669  
670  
671  
672  
673  
674  
675  
676  
677  
678  
679  
680  
681  
682  
683  
684  
685  
686  
687  
688  
689  
690  
691  
692  
693  
694  
695  
696  
697  
698  
699  
700  
701  
702  
703  
704  
705  
706  
707  
708  
709  
710  
711  
712  
713  
714  
715  
716  
717  
718  
719  
720  
721  
722  
723  
724  
725  
726  
727  
728  
729  
730  
731  
732  
733  
734  
735  
736  
737  
738  
739  
740  
741  
742  
743  
744  
745  
746  
747  
748  
749  
750  
751  
752  
753  
754  
755  
756  
757  
758  
759  
760  
761  
762  
763  
764  
765  
766  
767  
768  
769  
770  
771  
772  
773  
774  
775  
776  
777  
778  
779  
780  
781  
782  
783  
784  
785  
786  
787  
788  
789  
790  
791  
792  
793  
794  
795  
796  
797  
798  
799  
800  
801  
802  
803  
804  
805  
806  
807  
808  
809  
810  
811  
812  
813  
814  
815  
816  
817  
818  
819  
820  
821  
822  
823  
824  
825  
826  
827  
828  
829  
830  
831  
832  
833  
834  
835  
836  
837  
838  
839  
840  
841  
842  
843  
844  
845  
846  
847  
848  
849  
850  
851  
852  
853  
854  
855  
856  
857  
858  
859  
860  
861  
862  
863  
864  
865  
866  
867  
868  
869  
870  
871  
872  
873  
874  
875  
876  
877  
878  
879  
880  
881  
882  
883  
884  
885  
886  
887  
888  
889  
890  
891  
892  
893  
894  
895  
896  
897  
898  
899  
900  
901  
902  
903  
904  
905  
906  
907  
908  
909  
910  
911  
912  
913  
914  
915  
916  
917  
918  
919  
920  
921  
922  
923  
924  
925  
926  
927  
928  
929  
930  
931  
932  
933  
934  
935  
936  
937  
938  
939  
940  
941  
942  
943  
944  
945  
946  
947  
948  
949  
950  
951  
952  
953  
954  
955  
956  
957  
958  
959  
960  
961  
962  
963  
964  
965  
966  
967  
968  
969  
970  
971  
972  
973  
974  
975  
976  
977  
978  
979  
980  
981  
982  
983  
984  
985  
986  
987  
988  
989  
990  
991  
992  
993  
994  
995  
996  
997  
998  
999  
1000

Protective ventilator strategies such as high positive end expiratory pressure or recruitment maneuvers may increase intrathoracic pressure and consequently reduce jugular outflow;<sup>33</sup> low tidal volume and permissive hypercapnia may be detrimental in this group of patients, and rescue therapies used in ARDS patients such as prone position can be contraindicated for the risk of increased ICP and neuromonitoring tools displacement. Finally, extracorporeal membrane oxygenation (ECMO) can be contraindicated for the risk of haemorrhage.<sup>34</sup> However, although these patients have been traditionally ventilated with high tidal volumes and low positive end expiratory pressure,<sup>29</sup> recent evidence suggests that the concept of protective ventilation is gaining interest even in the brain injured population.<sup>19</sup>

1  
2  
3 Results from the VENTIBRAIN study will allow to clarify the current status of the  
4 ventilator management of these patients, and in particular to discriminate the  
5 effects of tidal volume, positive end expiratory pressure and driving pressure on  
6 outcomes in brain injured patients with, at risk of, or without acute distress  
7 respiratory pressure (using predefined scores), and the use of specific settings in  
8 case of intracranial hypertension. The VENTIBRAIN study offers a unique opportunity  
9 to globally uniform clinical guidelines regarding ventilator strategies in brain injured  
10 patients and eventually improving their outcome.  
11  
12  
13  
14  
15  
16  
17  
18

19 The VENTIBRAIN study has also several limitations that need to be addressed. First,  
20 we cannot exclude that ventilator settings and targets used by clinicians might be  
21 biased by the participation in the study, thus reducing the ability of VENTIBRAIN to  
22 represent the real ICU care of these patients. Second, the CRF designed for  
23 VENTIBRAIN was aimed to not cause excessive workload for the participating  
24 centres. Therefore, some data regarding systemic complications will be potentially  
25 missing, while continuous data on respiratory and neuromonitoring might be  
26 incomplete. Similarly, due to the limited number of daily arterial blood gases and  
27 ventilator settings data collection, we will have a limited view that might not reflect  
28 completely real clinical practice.  
29  
30  
31  
32  
33  
34  
35  
36  
37  
38

39 Finally, the observational nature of VENTIBRAIN makes impossible to draw causal  
40 inferences between ventilator management and outcome in this group of patients.  
41 However, VENTIBRAIN is aimed to generate hypotheses for treatment effects and  
42 pave the way to design future randomized controlled trials of ventilation in these  
43 settings to draw causal inferences and improve clinical outcomes in ventilated brain  
44 injured patients.  
45  
46  
47  
48

49 VENTIBRAIN is designed to assess and describe the clinical practice in ventilator  
50 strategies in critically ill brain injured patients in a large number of different  
51 countries/centers worldwide. Results from this study will help to identify differences  
52 in clinical practices and could be used to plan new trials on mechanical ventilation in  
53 this specific subgroup of patients.  
54  
55  
56  
57  
58  
59  
60

1  
2  
3  
4  
5  
6  
7 **Contributors:** CR, GC, FST, PP were equally responsible for writing of  
8 the manuscript and participated in study design. CR drafted the first version of the  
9 manuscript. FST, PP, GC, SG, PR, AV reviewed the manuscript and agreed with  
10 submission.  
11  
12  
13

14 **Funding:** This research received no specific grant from any funding agency in the  
15 public, commercial or not-for profit sectors.  
16  
17

18 **Competing interests:** None declared.  
19

20 Patient consent: Not required.  
21  
22  
23  
24  
25  
26  
27  
28  
29  
30  
31  
32  
33  
34  
35  
36  
37  
38  
39  
40  
41  
42  
43  
44  
45  
46  
47  
48  
49  
50  
51  
52  
53  
54  
55  
56  
57  
58  
59  
60



## References

1. Borsellino B, Schultz MJ, Gama de Abreu M et al. Mechanical ventilation in neurocritical care patients: a systematic literature review. *Expert Rev Respir Med* 2016 Oct;10(10):1123-32
2. Slutsky AS. Lung injury caused by mechanical ventilation. *Chest* 1999;116:9S-15S
3. Robba C, Bonatti G, Battaglini D et al. Mechanical ventilation in patients with acute ischaemic stroke: from pathophysiology to clinical practice. *Care* 2019 Dec 2;23(1):388
4. Samary CS, Ramos AB, Maia LA et al. Focal ischemic stroke leads to lung injury and reduces alveolar macrophage phagocytic capability in rats. *Crit Care* 2018 Oct 5;22(1):249
5. Heuer JF, Pelosi P, Hermann P et al. Acute effects of intracranial hypertension and ARDS on pulmonary and neuronal damage: a randomized experimental study in pigs. *Intensive Care Med*. 2011 Jul;37(7):1182-91
6. Putensen C, Theuerkauf N, Zinserling J et al. Meta-analysis: ventilation strategies and outcomes of the acute respiratory distress syndrome and acute lung injury. *Ann Intern Med* 2009;151:566-576
7. Saddy F, Sutherasan Y, Rocco PR et al. Ventilator-associated lung injury during assisted mechanical ventilation. *Semin Respir Crit Care Med* 2014 Aug;35(4):409-17
8. Esteban A, Ferguson ND, Meade MO, et al. Evolution of mechanical ventilation in response to clinical research. *Am J Respir Crit Care Med* 2008;177:170-177
9. Matthay MA, Ware LB, Zimmerman GA. The acute respiratory distress syndrome. *J Clin Invest* 2012;122:2731-2740
10. Needham DM, Colantuoni E, Mendez-Tellez PA et al. Lung protective mechanical ventilation and two year survival in patients with acute lung injury: prospective cohort study. *BMJ* 2012;344:e2124
11. Sage M, See W, Nault S et al. Effect of Low Versus High Tidal-Volume Total Liquid Ventilation on Pulmonary Inflammation. *Front Physiol*. 2020 Jun 18;11:603
12. Dellinger RP, Levy MM, Rhodes A, et al. Surviving sepsis campaign: international guidelines for management of severe sepsis and septic shock: 2012. *Crit Care Med* 2013;41:580-637.

- 1  
2  
3  
4  
5  
6  
7  
8  
9  
10  
11  
12  
13  
14  
15  
16  
17  
18  
19  
20  
21  
22  
23  
24  
25  
26  
27  
28  
29  
30  
31  
32  
33  
34  
35  
36  
37  
38  
39  
40  
41  
42  
43  
44  
45  
46  
47  
48  
49  
50  
51  
52  
53  
54  
55  
56  
57  
58  
59  
60
13. Determann RM, Royakkers A, Wolthuis EK et al. Ventilation with lower tidal volumes as compared with conventional tidal volumes for patients without acute lung injury: a preventive randomized controlled trial. *Crit Care* 2010;14:R1
14. Serpa Neto A, Cardoso SO, Manetta JA et al. Association between use of lung-protective ventilation with lower tidal volumes and clinical outcomes among patients without acute respiratory distress syndrome: a meta-analysis. *JAMA* 2012;308:1651-1659
15. Stevens RD, Lazaridis C, Chalela JA. The role of mechanical ventilation in acute brain injury. *Neurologic clinics*. 2008; 26: 543-563
16. Cinotti R, Bouras M, Roquilly A, Asehnoune K Management and weaning from mechanical ventilation in neurologic patients. *Annals of translational medicine* 2019; 6: 381
17. Della Torre V, Badenes R, Corradi F et al. Acute respiratory distress syndrome in traumatic brain injury: how do we manage it? *J Thorac Dis*. 2017 Dec;9(12):5368-5381
18. Robba C, Poole D, McNett M et al. Recommendations on Mechanical Ventilation in Acute Brain Injured Patients: Results of a European Society of Intensive Care Medicine and Neurocritical Care Society Consensus. *Intensive Care Med* 2020, Dec;46(12):2397-2410
19. Wilson JT, Pettigrew LE, Teasdale GM. Structured interviews for the Glasgow Outcome Scale and the extended Glasgow Outcome Scale: guidelines for their use. *J Neurotrauma* 1998;15:573-85
20. Citerio G, Prisco L, Oddo M et al. International prospective observational study on intracranial pressure in intensive care (ICU): the SYNAPSE-ICU study protocol. *BMJ Open* 2019 Apr 20;9(4):e026552.
21. Frisvold SK, Robba C, Guérin C. What respiratory targets should be recommended in patients with brain injury and respiratory failure? *Intensive Care Med*. 2019
22. Pelosi P, Ferguson ND, Frutos-Vivar F, et al. Management and outcome of mechanically ventilated neurologic patients. *Crit Care Med* 2011; 39: 1482-92
23. Koutsoukou A, Perraki H, Raftopoulou A, et al. Respiratory mechanics in brain-damaged patients. *Intensive Care Med* 2006; 32: 1947-1954
24. Nortje J, Coles JP, Timofeev I et al. Effect of hyperoxia on regional oxygenation and metabolism after severe traumatic brain injury: preliminary findings. *Crit Care Med* 2008; 36: 273-281

- 1  
2  
3 25. Hawryluk GW, Aguilera S, Buki A, et al. A management algorithm for patients  
4 with intracranial pressure monitoring: the Seattle International Severe Traumatic  
5 Brain Injury Consensus Conference (SIBICC). *Intensive Care Med* 2019;45(12):1783-  
6 1794  
7  
8  
9 26. Carney N, Totten AM, O'Reilly C, et al. Guidelines for the Management of Severe  
10 Traumatic Brain Injury, Fourth Edition. *Neurosurgery*. 2017, 1;80(1):6-15  
11  
12  
13 27. Karalapillai D, Weinberg L, Peyton P, et al. Effect of Intraoperative Low Tidal  
14 Volume vs Conventional Tidal Volume on Postoperative Pulmonary Complications in  
15 Patients Undergoing Major Surgery: A Randomized Clinical Trial.  
16 *JAMA*. 2020 Sep 1;324(9):848-858.  
17  
18  
19 28. Serpa Neto A, Simonis FD, Barbas CS, et al. Association between tidal volume  
20 size, duration of ventilation, and sedation needs in patients without acute  
21 respiratory distress syndrome: an individual patient data meta-analysis.  
22 *Intensive Care Med*. 2014 Jul;40(7):950-7  
23  
24  
25 29. Caricato A, Conti G, Della Corte F, et al. Effects of PEEP on the intracranial system  
26 of patients with head injury and subarachnoid hemorrhage: the role of respiratory  
27 system compliance. *J Trauma* 2005; 58: 571-576  
28  
29  
30 30. Robba C, Ortu A, Bilotta F et al. Extracorporeal membrane oxygenation for adult  
31 respiratory distress syndrome in trauma patients: A case series and systematic  
32 literature review. *J Trauma Acute Care Surg*. 2017 Jan;82(1):165-173  
33  
34  
35 31. Tejerina E, Pelosi P, Muriel A, et al. for VENTILA group. Association between  
36 ventilatory settings and development of acute respiratory distress syndrome in  
37 mechanically ventilated patients due to brain injury. *J Crit Care*. 2017  
38  
39  
40 32. Neto AS, Barbas CSV, Simonis FD et al. PROVENT; PROVE Network investigators.  
41 Epidemiological characteristics, practice of ventilation, and clinical outcome in  
42 patients at risk of acute respiratory distress syndrome in intensive care units from 16  
43 countries (PROVENT): an international, multicentre, prospective study. *Lancet Respir*  
44 *Med*. 2016 Nov;4(11):882-893  
45  
46  
47 33. Simonis FD, Serpa Neto A, Binnekade JM et al. Writing Group for the PReVENT  
48 Investigators, Effect of a Low vs Intermediate Tidal Volume Strategy on Ventilator-  
49 Free Days in Intensive Care Unit Patients Without ARDS: A Randomized Clinical Trial.  
50 *JAMA*. 2018 Nov 13;320(18):1872-1880.  
51  
52  
53 34. Serpa Neto A, Hemmes SN, Barbas CS, et al. PROVE Network  
54 Investigators. Protective versus Conventional Ventilation for Surgery: A Systematic  
55 Review and Individual Patient Data Meta-analysis. *Anesthesiology*. 2015  
56 Jul;123(1):66-78  
57  
58  
59  
60

### Figures headings:

Figure 1. Timetable of the study. Abbreviations: ABGs, arterial blood gases; ICU, intensive care unit; GOSE, Glasgow outcome scale extended.

### Tables

Table 1. The Berlin Definition of ARDS. Abbreviations: ARDS, acute respiratory distress syndrome; CPAP, continuous positive airway pressure; FiO<sub>2</sub>, fractional inspired oxygen; PaO<sub>2</sub>, arterial oxygen tension; PEEP, positive end-expiratory pressure.

| Criteria                     | Definition                                                                                                                                                                               |                                                                                            |                                                                                    |
|------------------------------|------------------------------------------------------------------------------------------------------------------------------------------------------------------------------------------|--------------------------------------------------------------------------------------------|------------------------------------------------------------------------------------|
| Cause                        | Respiratory failure not fully explained by cardiac failure or fluid overload; need objective assessment to exclude hydrostatic oedema if no risk factors present (eg, echocardiography). |                                                                                            |                                                                                    |
| Timing                       | Within 1 week of a known clinical insult or new/worsening respiratory symptoms.                                                                                                          |                                                                                            |                                                                                    |
| Chest imaging (Rx or CTscan) | Characteristics of the lung images                                                                                                                                                       |                                                                                            |                                                                                    |
| Oxygenation                  | Mild<br>200 < PaO <sub>2</sub> /FiO <sub>2</sub> ≤ 300<br>PEEP or CPAP ≥ 5 cm H <sub>2</sub> O                                                                                           | Moderate<br>100 < PaO <sub>2</sub> /FiO <sub>2</sub> ≤ 200<br>PEEP ≥ 5 cm H <sub>2</sub> O | Severe<br>PaO <sub>2</sub> /FiO <sub>2</sub> ≤ 100<br>PEEP ≥ 5 cm H <sub>2</sub> O |

Table 2. Glasgow Coma Scale

|        | 1                  | 2                                                   | 3                                                          | 4                                       | 5                            | 6              |
|--------|--------------------|-----------------------------------------------------|------------------------------------------------------------|-----------------------------------------|------------------------------|----------------|
| Eyes   | Does not open eyes | Opens eyes in response to pain                      | Opens eyes in response to voice                            | Opens eyes spontaneously                | N/A                          | N/A            |
| Verbal | Makes no sounds    | Makes sounds                                        | Words                                                      | Confused, disoriented                   | Oriented, converses normally | N/A            |
| Motor  | Makes no movements | Extension to painful stimuli (decerebrate response) | Abnormal flexion to painful stimuli (decorticate response) | Flexion / Withdrawal to painful stimuli | Localizes to painful stimuli | Obeys commands |

Table 3. Marshall classification of traumatic brain injury

|                                                    |                                                                                                                                                                                                                  |
|----------------------------------------------------|------------------------------------------------------------------------------------------------------------------------------------------------------------------------------------------------------------------|
| <b>Diffuse injury I<br/>(no visible pathology)</b> | <ul style="list-style-type: none"> <li>no visible intracranial pathology</li> </ul>                                                                                                                              |
| <b>Diffuse injury II<br/>(swelling)</b>            | <ul style="list-style-type: none"> <li>midline shift of 0 to 5 mm</li> <li>basal cisterns remain visible</li> <li>no high or mixed density lesions <math>&gt;25 \text{ cm}^3</math></li> </ul>                   |
| <b>Diffuse injury III</b>                          | <ul style="list-style-type: none"> <li>midline shift of 0 to 5 mm</li> <li>basal cisterns compressed or completely effaced</li> <li>no high or mixed density lesions <math>&gt;25 \text{ cm}^3</math></li> </ul> |
| <b>Diffuse injury IV<br/>(shift)</b>               | <ul style="list-style-type: none"> <li>midline shift <math>&gt;5 \text{ mm}</math></li> <li>no high or mixed density lesions <math>&gt;25 \text{ cm}^3</math></li> </ul>                                         |
| <b>Evacuated mass lesion V</b>                     | <ul style="list-style-type: none"> <li>any lesion evacuated surgically</li> </ul>                                                                                                                                |
| <b>Non-evacuated mass lesion VI</b>                | <ul style="list-style-type: none"> <li>high or mixed density lesions <math>&gt;25 \text{ cm}^3</math></li> <li>not surgically evacuated</li> </ul>                                                               |

Table 4. Fisher scale.

|                |                                                                                                                                                                                   |
|----------------|-----------------------------------------------------------------------------------------------------------------------------------------------------------------------------------|
| <b>Grade 1</b> | <ul style="list-style-type: none"><li>• no subarachnoid (SAH) or intraventricular hemorrhage (IVH) detected</li><li>• incidence of symptomatic vasospasm: 21%</li></ul>           |
| <b>Grade 2</b> | <ul style="list-style-type: none"><li>• diffuse thin (&lt;1 mm) SAH</li><li>• no clots</li><li>• incidence of symptomatic vasospasm: 25%</li></ul>                                |
| <b>Grade 3</b> | <ul style="list-style-type: none"><li>• localized clots and/or layers of blood &gt;1 mm in thickness</li><li>• no IVH</li><li>• incidence of symptomatic vasospasm: 37%</li></ul> |
| <b>Grade 4</b> | <ul style="list-style-type: none"><li>• diffuse or no SAH</li><li>• ICH or IVH present</li><li>• incidence of symptomatic vasospasm: 31%</li></ul>                                |

Table 5. Therapy intensity Level Scale. Abbreviations: ICP, intracranial pressure; CPP, cerebral perfusion pressure; CSF, cerebrospinal fluid; CO<sub>2</sub>, carbon dioxide;

| ITEM                                | DETAILS                                                                     | SPECIFICS             | SCORE | MAX |
|-------------------------------------|-----------------------------------------------------------------------------|-----------------------|-------|-----|
| Positioning                         | head elevation for ICP control                                              |                       | 1     | 1   |
|                                     | nursed flat (180°) for CPP management                                       |                       | 1     |     |
| Sedation and neuromuscular blockade | low dose sedation (as required for mechanical ventilation)                  |                       | 1     | 8   |
|                                     | higher dose sedation for ICP control (but not aiming for burst suppression) |                       | 2     |     |
|                                     | high dose propofol or barbiturates for ICP control (metabolic suppression)  |                       | 5     |     |
|                                     | neuromuscular blockade (paralysis)                                          |                       | 3     |     |
| CSF drainage                        | CSF drainage – low volume                                                   | < 120ml/day (< 5ml/h) | 2     | 3   |
|                                     | CSF drainage – high volume                                                  | ≥ 120ml/day (≥ 5ml/h) | 3     |     |
| CPP management                      | fluid loading for maintenance of cerebral perfusion                         |                       | 1     | 2   |
|                                     | vasopressor therapy required for management of cerebral perfusion           |                       | 1     |     |
| Ventilatory management              | mild hypocapnia for ICP control, based on arterial CO <sub>2</sub> in mmHg  | ≥ 35, < 40            | 1     | 4   |
|                                     | moderate hypocapnia for ICP control                                         | ≥ 30, < 35            | 2     |     |
|                                     | intensive hypocapnia for ICP control                                        | < 30                  | 4     |     |
| Hyperosmolar therapy                | mannitol                                                                    | ≤ 2g/kg/24h           | 2     | 6   |
|                                     | mannitol                                                                    | > 2g/kg/24h           | 3     |     |
|                                     | hypertonic saline                                                           | ≤ 0.3g/kg/24h         | 2     |     |
|                                     | hypertonic saline                                                           | > 0.3g/kg/24h         | 3     |     |



|  |                                                                                |  |   |    |
|--|--------------------------------------------------------------------------------|--|---|----|
|  |                                                                                |  |   |    |
|  | treatment of fever (T > 38°C or spontaneous T < 34.5°C)                        |  | 1 |    |
|  | cooling for ICP control, ≥ 35°C                                                |  | 2 |    |
|  | hypothermia < 35°C                                                             |  | 5 |    |
|  | intracranial operation for progressive mass lesion, NOT scheduled on admission |  | 4 |    |
|  | decompressive craniectomy                                                      |  | 5 |    |
|  | Maximum total possible score                                                   |  |   | 38 |

Table 6. Extended Glasgow Outcome Scale

| Category number | Definition                |
|-----------------|---------------------------|
| 1               | Upper good recovery       |
| 2               | Lower good recovery       |
| 3               | Upper moderate disability |
| 4               | Lower moderate disability |
| 5               | Upper severe disability   |
| 6               | Lower severe disability   |
| 7               | Vegetative State          |
| 8               | Death                     |

1  
2  
3  
4  
5  
6  
7  
8  
9  
10  
11  
12  
13  
14  
15  
16  
17  
18  
19  
20  
21  
22  
23  
24  
25  
26  
27  
28  
29  
30  
31  
32  
33  
34  
35  
36  
37  
38  
39  
40  
41  
42  
43  
44  
45  
46  
47  
48  
49  
50  
51  
52  
53  
54  
55  
56  
57  
58  
59  
60



254x190mm (72 x 72 DPI)
